# Supplementary material for: Metal-free C-3 selective C(sp2)–C(sp3) heteroarylation of anilines with imidazo[1,2-a]pyridine derivatives via cross-dehydrogenative coupling
Source: Royal Society of Chemistry journal article supplement (doi:10.1039/d3ra03852a), 2023-01-01

## Supporting Information

### **Metal-Free C-3 Selective C(sp<sup>2</sup>)-C(sp<sup>3</sup>) Heteroarylation of Anilines with Imidazo[1,2-*a*]pyridine Derivatives *via* Cross-Dehydrogenative Coupling**

Kai Wang,<sup>a</sup> Xiaoxue Du,<sup>a</sup> Pengfei Zhang,<sup>b</sup> Zhenjiang Wei,<sup>c\*</sup> and Xian-Ting Cao<sup>a\*</sup>

<sup>a</sup> College of Medical Engineering & the Key Laboratory for Medical Functional Nanomaterials, Jining Medical University, Jining, 272067, China.

<sup>b</sup> College of Material, Chemistry and Chemical Engineering, Key Laboratory of Organosilicon Chemistry and Material Technology, Ministry of Education, Hangzhou Normal University, Hangzhou, 311121, China.

<sup>c</sup> Department of Pharmaceutical Engineering, Shandong Medicine Technician College, Taian, 271016, China.

Emails: chemcxt@mail.jnmc.edu.cn; tianyiwzj@126.com.

## Table of Contents

|                                                                                      |   |
|--------------------------------------------------------------------------------------|---|
| <sup>1</sup> H, <sup>13</sup> C and <sup>19</sup> F NMR spectra of the products..... | 2 |
|--------------------------------------------------------------------------------------|---|

***N,N*-dimethyl-4-((2-phenylimidazo[1,2-*a*]pyridin-3-yl)methyl)aniline (3a)**

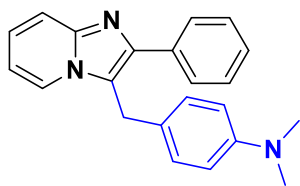

Obtained as a white solid in 65% yield;  $^1\text{H}$  NMR (400 MHz,  $\text{CDCl}_3$ )  $\delta$  7.82 (d,  $J = 6.7$  Hz, 2H), 7.74 (d,  $J = 6.1$  Hz, 1H), 7.68 (d,  $J = 8.9$  Hz, 1H), 7.43 (t,  $J = 6.6$  Hz, 2H), 7.35 (d,  $J = 7.3$  Hz, 1H), 7.17 (t,  $J = 7.4$  Hz, 1H), 7.01 (d,  $J = 7.7$  Hz, 2H), 6.69 (dd,  $J = 8.9, 7.1$  Hz, 3H), 4.40 (s, 2H), 2.92 (s, 6H).  $^{13}\text{C}$  NMR (100 MHz,  $\text{CDCl}_3$ )  $\delta$  149.63, 144.75, 143.71, 134.58, 128.63, 128.39, 128.27, 127.66, 124.13, 123.67, 118.54, 117.40, 113.15, 112.12, 40.66, 28.89. HRMS (ESI) ( $[\text{M}+\text{H}]^+$ ) Calcd. for  $\text{C}_{22}\text{H}_{22}\text{N}_3$ : 328.1808, Found: 328.1801.

**4-((2-(4-methoxyphenyl)imidazo[1,2-*a*]pyridin-3-yl)methyl)-*N,N*-dimethylaniline (3b)**

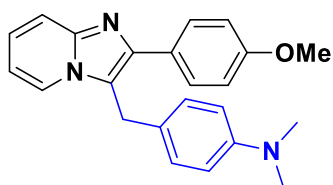

Obtained as a white solid in 65% yield;  $^1\text{H}$  NMR (400 MHz,  $\text{CDCl}_3$ )  $\delta$  7.73 (t,  $J = 9.0$  Hz, 3H), 7.66 (d,  $J = 9.0$  Hz, 1H), 7.14 (t,  $J = 7.8$  Hz, 1H), 7.01-6.95 (m, 4H), 6.69-6.65 (m, 3H), 4.37 (s, 2H), 3.83 (s, 3H), 2.90 (s, 6H).  $^{13}\text{C}$  NMR (100 MHz,  $\text{CDCl}_3$ )  $\delta$  159.28, 149.58, 144.60, 143.53, 129.38, 128.35, 127.16, 124.22, 123.90, 123.50, 117.79, 117.15, 114.05, 113.11, 111.94, 55.27, 40.63, 28.86. HRMS (ESI) ( $[\text{M}+\text{H}]^+$ ) Calcd. for  $\text{C}_{23}\text{H}_{24}\text{N}_3\text{O}$ : 358.1914, Found: 358.1918.

**4-((2-(4-fluorophenyl)imidazo[1,2-*a*]pyridin-3-yl)methyl)-*N,N*-dimethylaniline (3c)**

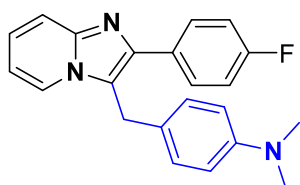

Obtained as a white solid in 54% yield;  $^1\text{H}$  NMR (400 MHz,  $\text{CDCl}_3$ )  $\delta$  7.82-7.75 (m, 3H), 7.70 (d,  $J = 9.1$  Hz, 1H), 7.23-7.19 (m, 1H), 7.16-7.11 (m, 2H), 7.01 (d,  $J = 8.7$  Hz, 2H), 6.76-6.72 (m, 1H), 6.69 (d,  $J = 8.7$  Hz, 2H), 4.39 (s, 2H), 2.94 (s, 6H).  $^{13}\text{C}$  NMR (100 MHz,  $\text{CDCl}_3$ )  $\delta$  163.82 (d,  $J_{\text{C-F}} = 246.0$  Hz), 149.67, 144.59, 142.62, 130.50 (d,  $J_{\text{C-F}} = 3.0$  Hz), 129.94 (d,  $J_{\text{C-F}} = 8.0$  Hz), 128.31, 124.43, 123.82, 123.68, 118.36, 117.29, 115.70 (d,  $J_{\text{C-F}} = 21.0$  Hz), 113.14, 112.32, 40.64, 28.79.  $^{19}\text{F}$  NMR (376 MHz,  $\text{CDCl}_3$ )  $\delta$  -57.73. HRMS (ESI) ( $[\text{M}+\text{H}]^+$ )

Calcd. for C<sub>22</sub>H<sub>21</sub>N<sub>3</sub>F: 346.1714. Found: 346.1718.

**4-((2-(4-bromophenyl)imidazo[1,2-*a*]pyridin-3-yl)methyl)-*N,N*-dimethylaniline (3d)**

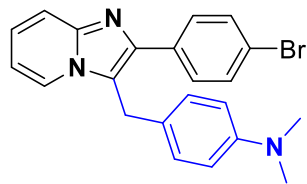

Obtained as a white solid in 60% yield; <sup>1</sup>H NMR (400 MHz, CDCl<sub>3</sub>) δ 7.76 (d, *J* = 6.8 Hz, 1H), 7.69 (t, *J* = 7.2 Hz, 3H), 7.56 (d, *J* = 8.3 Hz, 2H), 7.23-7.15 (m, 1H), 7.00 (d, *J* = 8.3 Hz, 2H), 6.76-6.65 (m, 3H), 4.38 (s, 2H), 2.93 (s, 6H). <sup>13</sup>C NMR (100 MHz, CDCl<sub>3</sub>) δ 149.64, 144.75, 142.49, 133.54, 131.71, 129.69, 128.27, 124.36, 123.70, 123.62, 121.78, 118.72, 117.39, 113.10, 112.26, 40.59, 28.80. HRMS (ESI) ([M+H]<sup>+</sup>) Calcd. for C<sub>22</sub>H<sub>21</sub>BrN<sub>3</sub>: 406.0913, Found: 406.0919.

**4-((2-(3-chlorophenyl)imidazo[1,2-*a*]pyridin-3-yl)methyl)-*N,N*-dimethylaniline (3e)**

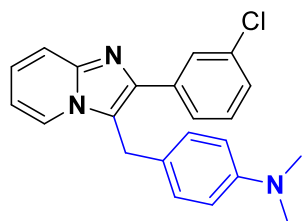

Obtained as a white solid in 55% yield; <sup>1</sup>H NMR (400 MHz, CDCl<sub>3</sub>) δ 7.89 (s, 1H), 7.77 (d, *J* = 6.8 Hz, 1H), 7.73-7.64 (m, 2H), 7.39-7.31 (m, 2H), 7.21 (t, *J* = 7.5 Hz, 1H), 7.00 (d, *J* = 7.7 Hz, 2H), 6.73 (t, *J* = 6.8 Hz, 1H), 6.69 (d, *J* = 7.4 Hz, 2H), 4.40 (s, 2H), 2.93 (s, 6H). <sup>13</sup>C NMR (100 MHz, CDCl<sub>3</sub>) δ 149.65, 144.70, 142.10, 136.35, 134.61, 129.81, 128.33, 128.26, 127.69, 126.18, 124.53, 123.72, 123.70, 119.09, 117.43, 113.14, 112.38, 40.61, 28.81. HRMS (ESI) ([M+H]<sup>+</sup>) Calcd. for C<sub>22</sub>H<sub>21</sub>ClN<sub>3</sub>: 362.1419, Found: 362.1411.

**4-((2-(3-methoxyphenyl)imidazo[1,2-*a*]pyridin-3-yl)methyl)-*N,N*-dimethylaniline (3f)**

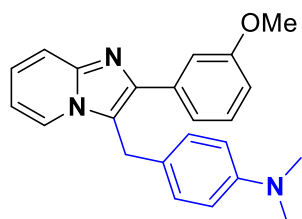

Obtained as a white solid in 60% yield; <sup>1</sup>H NMR (400 MHz, CDCl<sub>3</sub>) δ 7.76 (d, *J* = 6.9 Hz, 1H), 7.70 (d, *J* = 9.1 Hz, 1H), 7.44 (d, *J* = 2.0 Hz, 1H), 7.39 (d, *J* = 7.6 Hz, 1H),

7.33 (t,  $J = 7.8$  Hz, 1H), 7.21-7.14 (m, 1H), 7.02 (d,  $J = 8.6$  Hz, 2H), 6.95-6.90 (m, 1H), 6.69 (dd,  $J = 10.1, 7.8$  Hz, 3H), 4.42 (s, 2H), 3.83 (s, 3H), 2.92 (s, 6H).  $^{13}\text{C}$  NMR (100 MHz,  $\text{CDCl}_3$ )  $\delta$  159.88, 149.61, 144.69, 143.63, 136.04, 129.57, 128.38, 124.18, 124.09, 123.64, 120.60, 118.75, 117.42, 114.04, 113.15, 112.11, 55.32, 40.66, 28.91. HRMS (ESI) ( $[\text{M}+\text{H}]^+$ ) Calcd. for  $\text{C}_{23}\text{H}_{24}\text{N}_3\text{O}$ : 358.1914, Found: 358.1918.

***N,N*-dimethyl-4-((2-(thiophen-2-yl)imidazo[1,2-*a*]pyridin-3-yl)methyl)aniline (3g)**

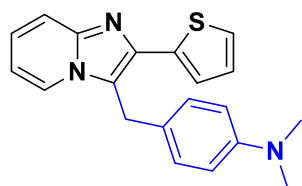

Obtained as a white solid in 52% yield;  $^1\text{H}$  NMR (400 MHz,  $\text{CDCl}_3$ )  $\delta$  7.80-7.74 (m, 1H), 7.66 (d,  $J = 9.1$  Hz, 1H), 7.46-7.43 (m, 1H), 7.35 (dd,  $J = 5.1, 1.1$  Hz, 1H), 7.18-7.14 (m, 1H), 7.10 (dd,  $J = 5.1, 3.6$  Hz, 1H), 7.03 (d,  $J = 8.7$  Hz, 2H), 6.71-6.65 (m, 3H), 4.45 (s, 2H), 2.91 (s, 6H).  $^{13}\text{C}$  NMR (100 MHz,  $\text{CDCl}_3$ )  $\delta$  149.65, 144.66, 138.21, 137.76, 128.48, 127.74, 125.43, 124.51, 124.33, 123.74, 123.40, 118.26, 117.24, 113.09, 112.25, 40.65, 28.90. HRMS (ESI) ( $[\text{M}+\text{H}]^+$ ) Calcd. for  $\text{C}_{20}\text{H}_{20}\text{N}_3\text{S}$ : 334.1372, Found: 334.1377.

***N,N*-dimethyl-4-((7-methyl-2-phenylimidazo[1,2-*a*]pyridin-3-yl)methyl)aniline (3h)**

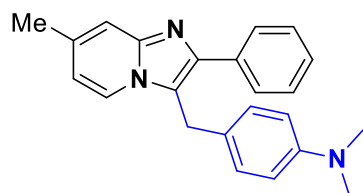

Obtained as a white solid in 50% yield;  $^1\text{H}$  NMR (400 MHz,  $\text{CDCl}_3$ )  $\delta$  7.84-7.76 (m, 2H), 7.61 (d,  $J = 7.0$  Hz, 1H), 7.42 (dd,  $J = 12.8, 5.3$  Hz, 3H), 7.33 (t,  $J = 7.4$  Hz, 1H), 7.00 (d,  $J = 8.7$  Hz, 2H), 6.67 (d,  $J = 8.7$  Hz, 2H), 6.53 (dd,  $J = 7.0, 1.5$  Hz, 1H), 4.37 (s, 2H), 2.91 (s, 6H), 2.38 (s, 3H).  $^{13}\text{C}$  NMR (100 MHz,  $\text{CDCl}_3$ )  $\delta$  149.59, 145.07, 143.12, 135.21, 134.58, 128.60, 128.38, 128.17, 127.55, 124.35, 122.91, 117.91, 115.74, 114.81, 113.13, 40.68, 28.85, 21.37. HRMS (ESI) ( $[\text{M}+\text{H}]^+$ ) Calcd. for  $\text{C}_{23}\text{H}_{24}\text{N}_3$ : 342.1965, Found: 342.1970.

**4-((7-chloro-2-phenylimidazo[1,2-*a*]pyridin-3-yl)methyl)-*N,N*-dimethylaniline (3i)**

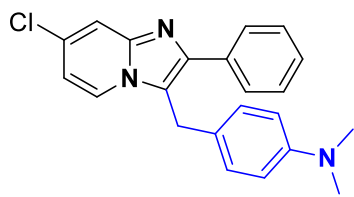

Obtained as a white solid in 38% yield;  $^1\text{H}$  NMR (400 MHz,  $\text{CDCl}_3$ )  $\delta$  7.82-7.75 (m, 2H), 7.69-7.62 (m, 2H), 7.47-7.36 (m, 3H), 7.02-6.96 (m, 2H), 6.71-6.63 (m, 3H), 4.40 (s, 2H), 2.94 (s, 6H).  $^{13}\text{C}$  NMR (100 MHz,  $\text{CDCl}_3$ )  $\delta$  149.68, 144.52, 144.39, 134.08, 130.68, 128.68, 128.32, 128.19, 127.91, 123.98, 123.55, 118.86, 116.19, 113.70, 113.14, 40.61, 28.82. HRMS (ESI) ( $[\text{M}+\text{H}]^+$ ) Calcd. for  $\text{C}_{22}\text{H}_{21}\text{ClN}_3$ : 362.1419, Found: 362.1410.

#### 4-((7-methoxy-2-phenylimidazo[1,2-a]pyridin-3-yl)methyl)-*N,N*-dimethylaniline (3j)

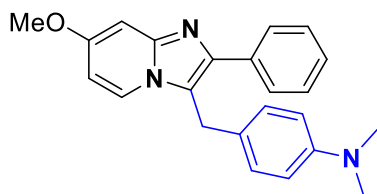

Obtained as a white solid in 55% yield;  $^1\text{H}$  NMR (400 MHz,  $\text{CDCl}_3$ )  $\delta$  7.84-7.78 (m, 2H), 7.57 (d,  $J = 7.5$  Hz, 1H), 7.43 (t,  $J = 7.5$  Hz, 2H), 7.34 (t,  $J = 7.3$  Hz, 1H), 7.04-7.00 (m, 3H), 6.69 (d,  $J = 8.6$  Hz, 2H), 6.44 (dd,  $J = 7.4, 2.3$  Hz, 1H), 4.37 (s, 2H), 3.88 (s, 3H), 2.93 (s, 6H).  $^{13}\text{C}$  NMR (100 MHz,  $\text{CDCl}_3$ )  $\delta$  157.80, 149.62, 146.02, 142.77, 134.58, 128.58, 128.38, 127.98, 127.46, 124.41, 124.19, 117.32, 113.15, 107.14, 94.62, 55.52, 40.67, 28.82. HRMS (ESI) ( $[\text{M}+\text{H}]^+$ ) Calcd. for  $\text{C}_{23}\text{H}_{24}\text{N}_3\text{O}$ : 358.1914, Found: 358.1910.

#### *N,N*-dimethyl-4-((6-methyl-2-phenylimidazo[1,2-a]pyridin-3-yl)methyl)aniline (3k)

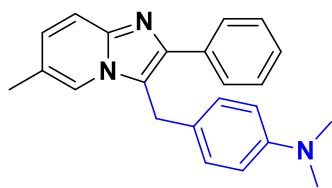

Obtained as a white solid in 48% yield;  $^1\text{H}$  NMR (400 MHz,  $\text{CDCl}_3$ )  $\delta$  7.82 (d,  $J = 7.3$  Hz, 2H), 7.60 (d,  $J = 9.1$  Hz, 1H), 7.55 (s, 1H), 7.43 (t,  $J = 7.4$  Hz, 2H), 7.39-7.32 (m, 1H), 7.04 (d,  $J = 8.5$  Hz, 3H), 6.71 (d,  $J = 8.5$  Hz, 2H), 4.39 (s, 2H), 2.94 (s, 6H), 2.26 (s, 3H).  $^{13}\text{C}$  NMR (100 MHz,  $\text{CDCl}_3$ )  $\delta$  149.54, 143.77, 143.40, 134.66, 128.55, 128.34, 128.07, 127.47, 127.30, 124.35, 121.71, 121.16, 118.21, 116.68, 113.11, 40.64, 28.81, 18.42. HRMS (ESI) ( $[\text{M}+\text{H}]^+$ ) Calcd. for  $\text{C}_{23}\text{H}_{24}\text{N}_3$ : 342.1965, Found: 342.1960.

#### *N,N*-dimethyl-4-((8-methyl-2-phenylimidazo[1,2-a]pyridin-3-yl)methyl)aniline (3m)

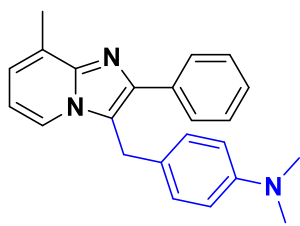

Obtained as a white solid in 47% yield;  $^1\text{H}$  NMR (400 MHz,  $\text{CDCl}_3$ )  $\delta$  7.84 (d,  $J = 7.2$  Hz, 2H), 7.64 (d,  $J = 6.8$  Hz, 1H), 7.45 (t,  $J = 7.5$  Hz, 2H), 7.36 (t,  $J = 7.4$  Hz, 1H), 7.03 (d,  $J = 8.6$  Hz, 2H), 6.98 (d,  $J = 6.8$  Hz, 1H), 6.70 (d,  $J = 8.6$  Hz, 2H), 6.63 (t,  $J = 6.8$  Hz, 1H), 4.39 (s, 2H), 2.93 (s, 6H), 2.72 (s, 3H).  $^{13}\text{C}$  NMR (100 MHz,  $\text{CDCl}_3$ )  $\delta$  149.53, 145.16, 143.34, 134.89, 128.54, 128.41, 128.38, 127.44, 127.31, 124.50, 122.83, 121.50, 118.83, 113.09, 112.02, 40.65, 28.95, 17.19. HRMS (ESI) ( $[\text{M}+\text{H}]^+$ ) Calcd. for  $\text{C}_{23}\text{H}_{24}\text{N}_3$ : 342.1965, Found: 342.1970.

#### 4-((8-(benzyloxy)-2-phenylimidazo[1,2-a]pyridin-3-yl)methyl)-N,N-dimethylaniline (3n)

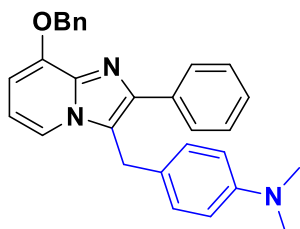

Obtained as a white solid in 51% yield;  $^1\text{H}$  NMR (400 MHz,  $\text{CDCl}_3$ )  $\delta$  7.88 (dd,  $J = 5.2, 3.3$  Hz, 2H), 7.54 (d,  $J = 7.2$  Hz, 2H), 7.46-7.32 (m, 7H), 7.03 (d,  $J = 8.7$  Hz, 2H), 6.69 (dd,  $J = 9.2, 2.3$  Hz, 2H), 6.55-6.50 (m, 1H), 6.46 (d,  $J = 7.0$  Hz, 1H), 5.43 (s, 2H), 4.39 (s, 2H), 2.93 (s, 6H).  $^{13}\text{C}$  NMR (100 MHz,  $\text{CDCl}_3$ )  $\delta$  149.52, 147.85, 143.04, 139.26, 136.51, 134.59, 128.58, 128.45, 128.40, 128.38, 127.93, 127.45, 127.21, 124.40, 119.52, 116.80, 113.08, 111.82, 102.77, 70.67, 40.64, 29.05. HRMS (ESI) ( $[\text{M}+\text{H}]^+$ ) Calcd. for  $\text{C}_{29}\text{H}_{28}\text{N}_3\text{O}$ : 434.2227, Found: 434.2222.

#### N,N,3,5-tetramethyl-4-((2-phenylimidazo[1,2-a]pyridin-3-yl)methyl)aniline (3o)

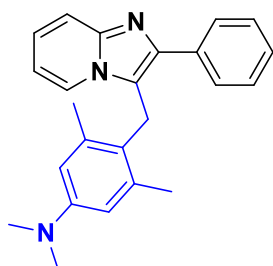

Obtained as a white solid in 45% yield;  $^1\text{H}$  NMR (400 MHz,  $\text{CDCl}_3$ )  $\delta$  7.77-7.74 (m, 2H), 7.64-7.61 (m, 1H), 7.55-7.53 (m, 1H), 7.48-7.45 (m, 2H), 7.40 - 7.34 (m, 1H), 7.10-7.06 (m, 1H), 6.58 (td,  $J = 6.9, 1.2$  Hz, 1H), 6.40 (s, 2H), 4.47 (s, 2H), 2.91 (s, 6H), 2.10 (s, 6H).  $^{13}\text{C}$  NMR (100 MHz,  $\text{CDCl}_3$ )  $\delta$  149.31, 144.33, 143.32, 137.59, 135.00, 128.94, 128.29, 127.37, 123.99, 123.27, 120.96, 118.98, 117.36, 113.26, 111.89, 40.57, 25.00, 21.19.

HRMS (ESI) ( $[M+H]^+$ ) Calcd. for  $C_{24}H_{26}N_3$ : 356.2121, Found: 356.2127.

***N,N*-dimethyl-4-((2-phenylbenzo[d]imidazo[2,1-*b*]thiazol-3-yl)methyl)aniline (3p)**

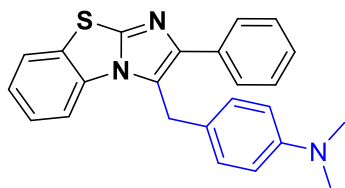

Obtained as a white solid in 54% yield;  $^1H$  NMR (400 MHz,  $DMSO-d_6$ )  $\delta$  8.00-7.95 (m, 1H), 7.67-7.61 (m, 2H), 7.55-7.51 (m, 1H), 7.42-7.38 (m, 2H), 7.35-7.29 (m, 3H), 7.01 (d,  $J = 8.7$  Hz, 2H), 6.66 (d,  $J = 8.8$  Hz, 2H), 4.53 (s, 2H), 2.81 (s, 6H).  $^{13}C$  NMR (100 MHz,  $DMSO-d_6$ )  $\delta$  149.69, 146.46, 144.30, 134.77, 132.78, 129.85, 129.08, 128.43, 127.61, 127.30, 126.86, 125.36, 125.11, 124.97, 123.40, 113.90, 113.47, 29.42. HRMS (ESI) ( $[M+H]^+$ ) Calcd. for  $C_{24}H_{22}N_3S$ : 384.1529, Found: 384.1533.

**4-((2-(4-chlorophenyl)benzo[d]imidazo[2,1-*b*]thiazol-3-yl)methyl)-*N,N*-dimethylaniline (3q)**

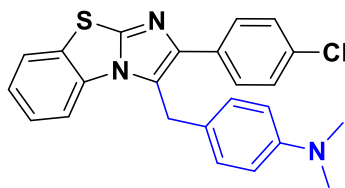

Obtained as a white solid in 48% yield;  $^1H$  NMR (400 MHz,  $CDCl_3$ )  $\delta$  7.68-7.59 (m, 3H), 7.43-7.41 (m, 1H), 7.33 (d,  $J = 8.3$  Hz, 2H), 7.25-7.21 (m, 2H), 7.10 (d,  $J = 8.4$  Hz, 2H), 6.72 (d,  $J = 8.5$  Hz, 2H), 4.49 (s, 2H), 2.92 (s, 6H).  $^{13}C$  NMR (100 MHz,  $CDCl_3$ )  $\delta$  149.49, 147.14, 144.01, 133.05, 132.91, 130.36, 129.62, 128.73, 128.62, 128.29, 126.14, 124.38, 124.12, 122.71, 113.52, 113.36, 40.66, 29.90. HRMS (ESI) ( $[M+H]^+$ ) Calcd. for  $C_{24}H_{21}ClN_3S$ : 418.1139, Found: 418.1130.

***N,N*-dimethyl-4-((2-(*p*-tolyl)benzo[d]imidazo[2,1-*b*]thiazol-3-yl)methyl)aniline (3r)**

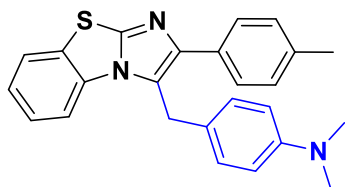

Obtained as a white solid in 59% yield;  $^1H$  NMR (400 MHz,  $CDCl_3$ )  $\delta$  7.77-7.65 (m, 3H), 7.52-7.49 (m, 1H), 7.34-7.29 (m, 4H), 7.22 (d,  $J = 7.1$  Hz, 2H), 6.81 (d,  $J = 6.8$  Hz, 2H), 4.60 (s, 2H), 3.01 (s, 6H), 2.46 (s, 3H).  $^{13}C$  NMR (100 MHz,  $DMSO$ )  $\delta$  144.76, 142.10, 140.50, 132.22, 128.35, 126.88, 125.63, 124.55, 123.64, 122.62, 121.30, 120.58, 119.41, 119.32,

117.46, 108.74, 108.55, 35.93, 25.24, 16.53. HRMS (ESI) ( $[M+H]^+$ ) Calcd. for  $C_{25}H_{24}N_3S$ : 398.1685, Found: 398.1691.

**4-((2-(2-methoxyphenyl)benzo[d]imidazo[2,1-b]thiazol-3-yl)methyl)-*N,N*-dimethylaniline (3s)**

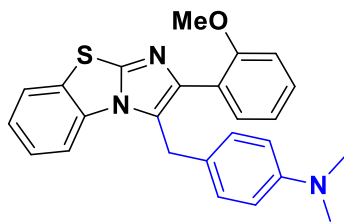

Obtained as a white solid in 40% yield;  $^1H$  NMR (400 MHz,  $CDCl_3$ )  $\delta$  7.68-7.63 (m, 1H), 7.65-7.54 (m, 1H), 7.42-7.38 (m, 1H), 7.36-7.31 (m, 1H), 7.20-7.15 (m, 2H), 7.08 (d,  $J = 8.5$  Hz, 2H), 7.02 (t,  $J = 7.4$  Hz, 1H), 6.97 (d,  $J = 8.3$  Hz, 1H), 6.69 (d,  $J = 8.6$  Hz, 2H), 4.34 (s, 2H), 3.67 (s, 3H), 2.91 (s, 6H).  $^{13}C$  NMR (100 MHz,  $CDCl_3$ )  $\delta$  157.15, 149.27, 146.69, 142.17, 133.16, 131.90, 130.33, 129.18, 128.43, 126.12, 125.89, 124.25, 124.00, 123.92, 123.46, 120.57, 113.80, 113.13, 110.89, 55.28, 40.76, 30.01. HRMS (ESI) ( $[M+H]^+$ ) Calcd. for  $C_{25}H_{24}N_3OS$ : 414.1635, Found: 414.1631.



### 3a <sup>1</sup>H NMR

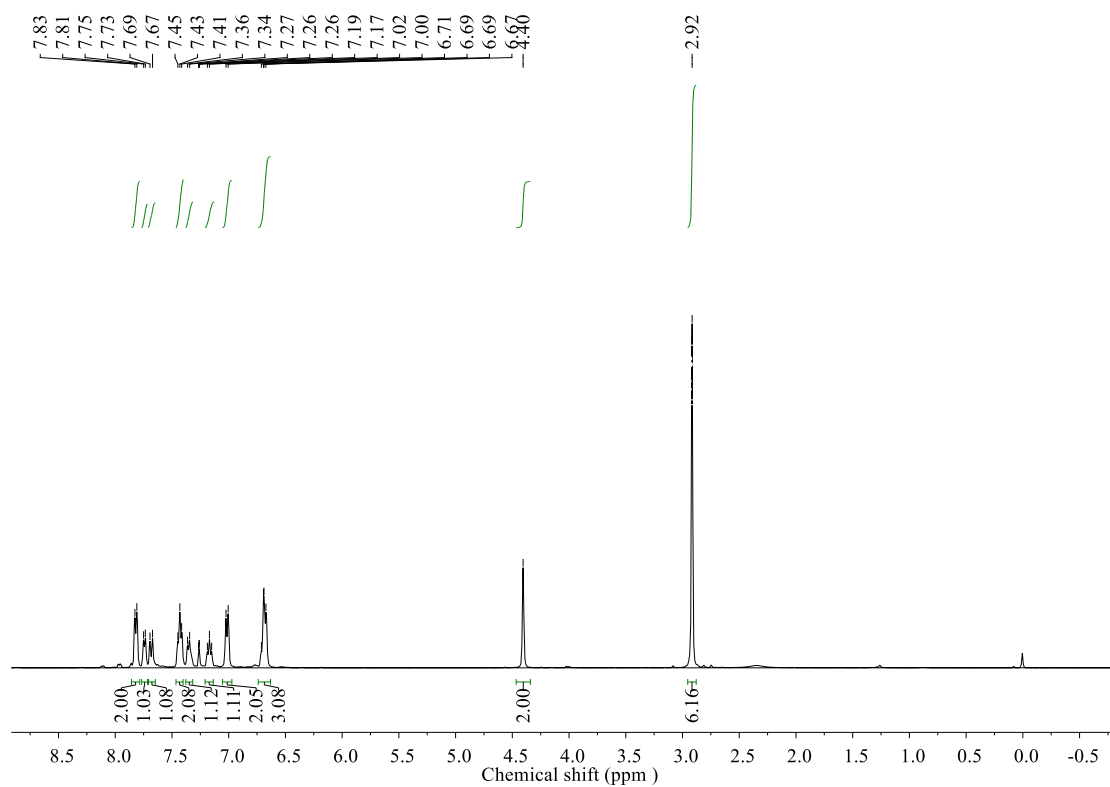

### 3a <sup>13</sup>C NMR

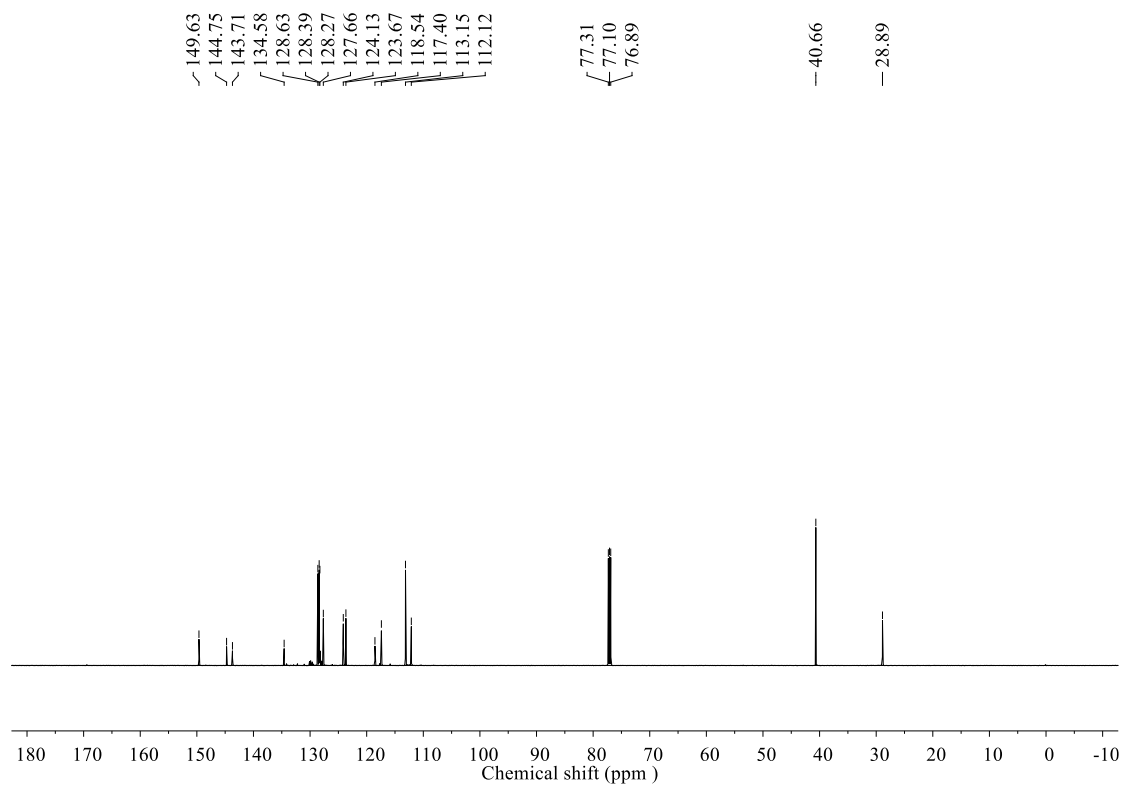

### 3b <sup>1</sup>H NMR

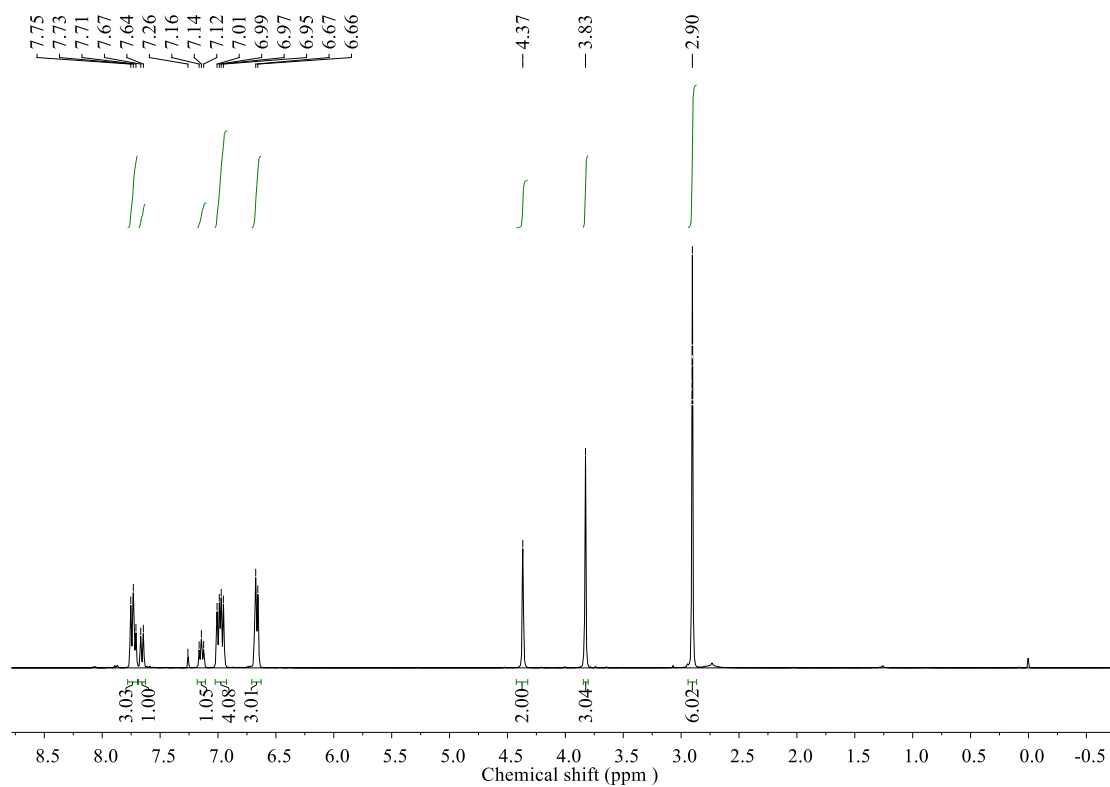

### 3b <sup>13</sup>C NMR

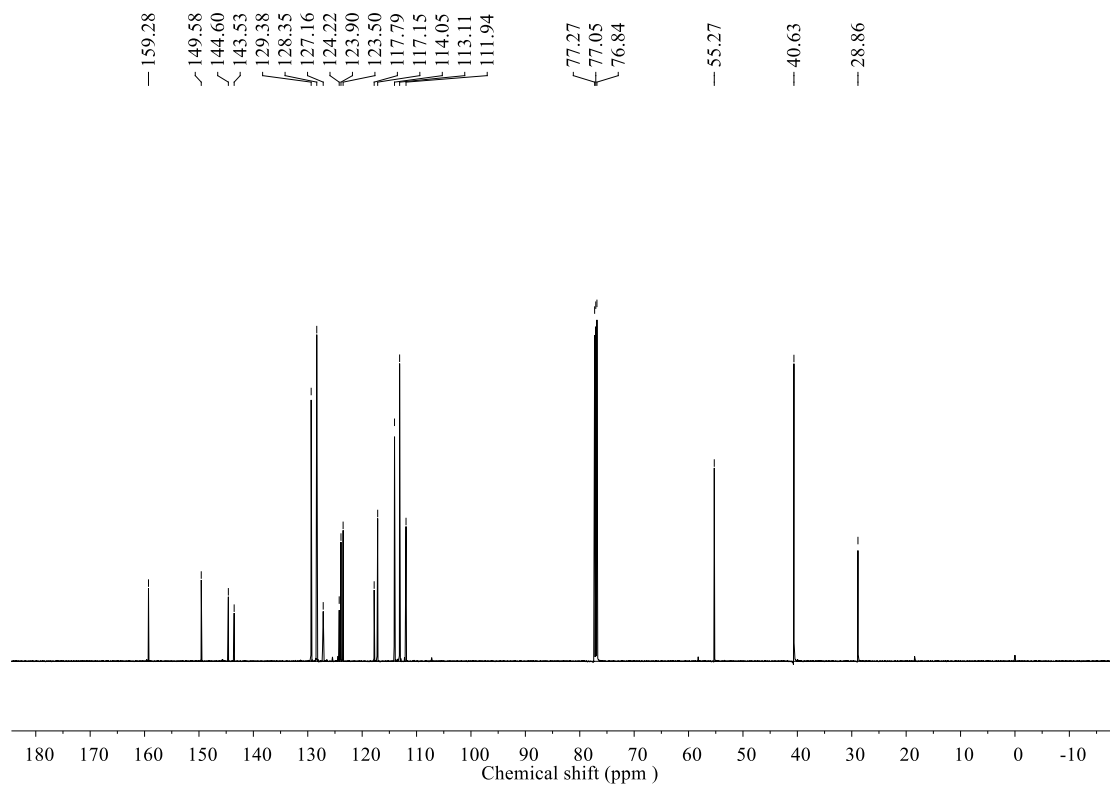

### 3c <sup>1</sup>H NMR

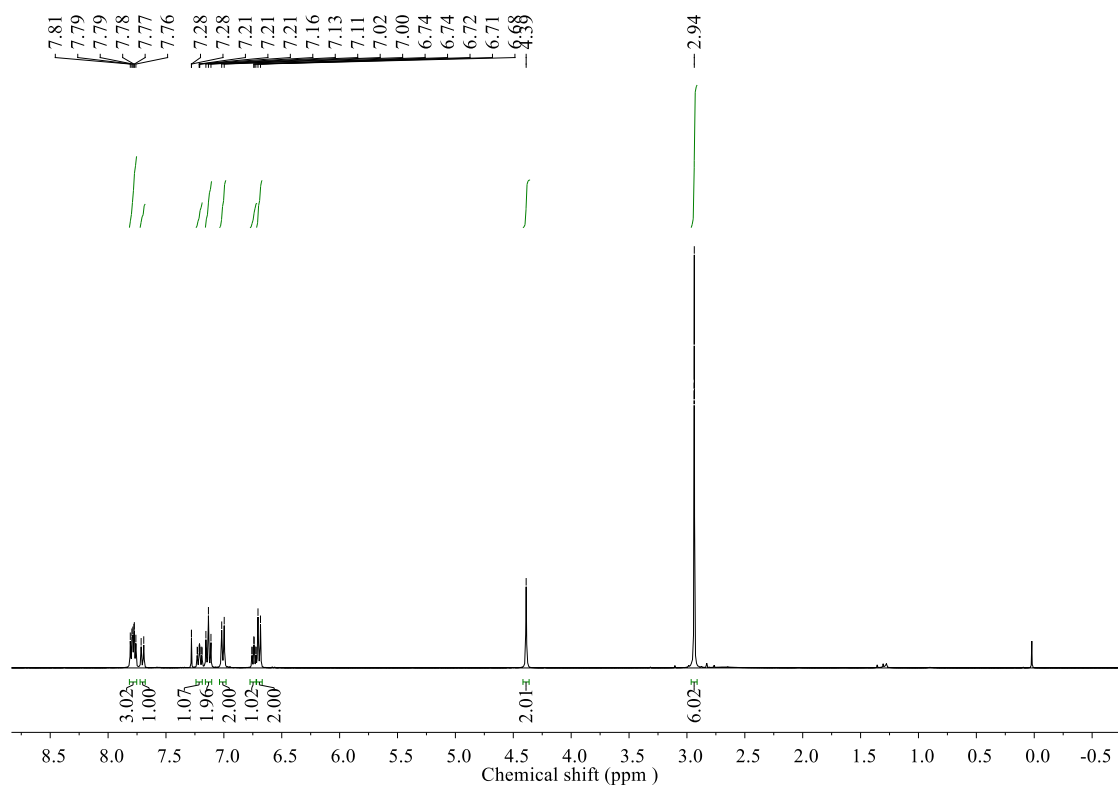

### 3c <sup>13</sup>C NMR

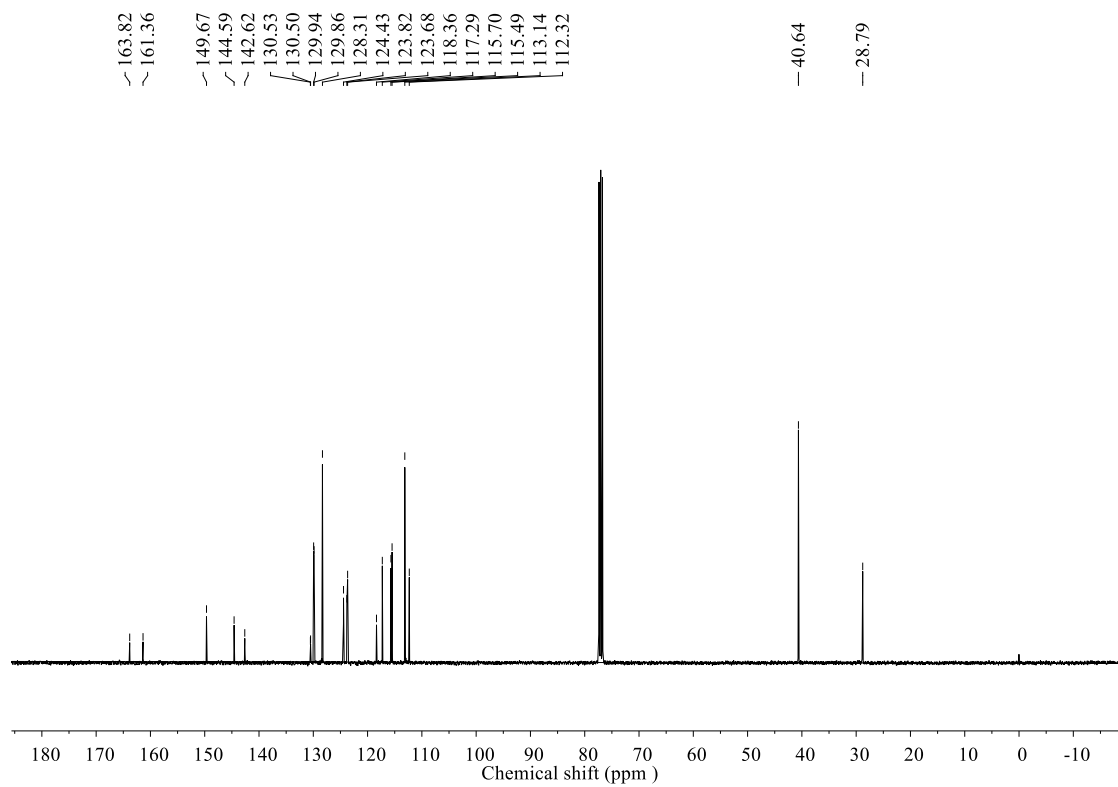

**3c <sup>19</sup>F NMR**

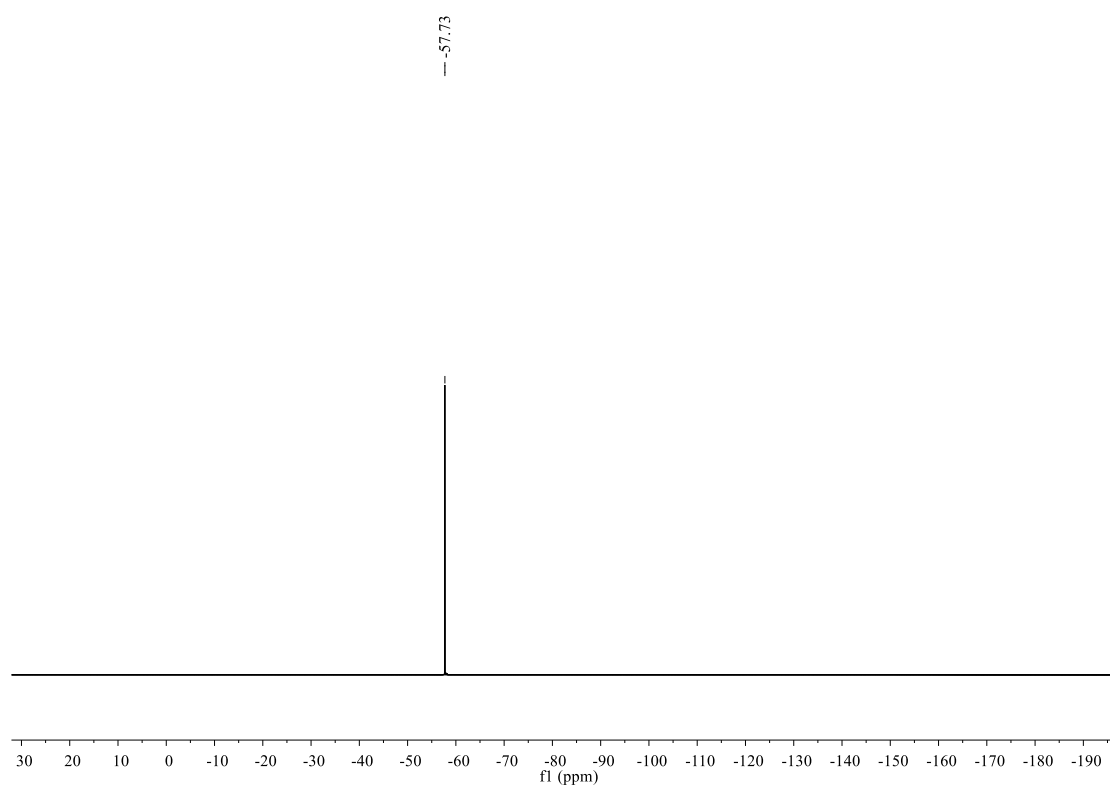

### 3d <sup>1</sup>H NMR

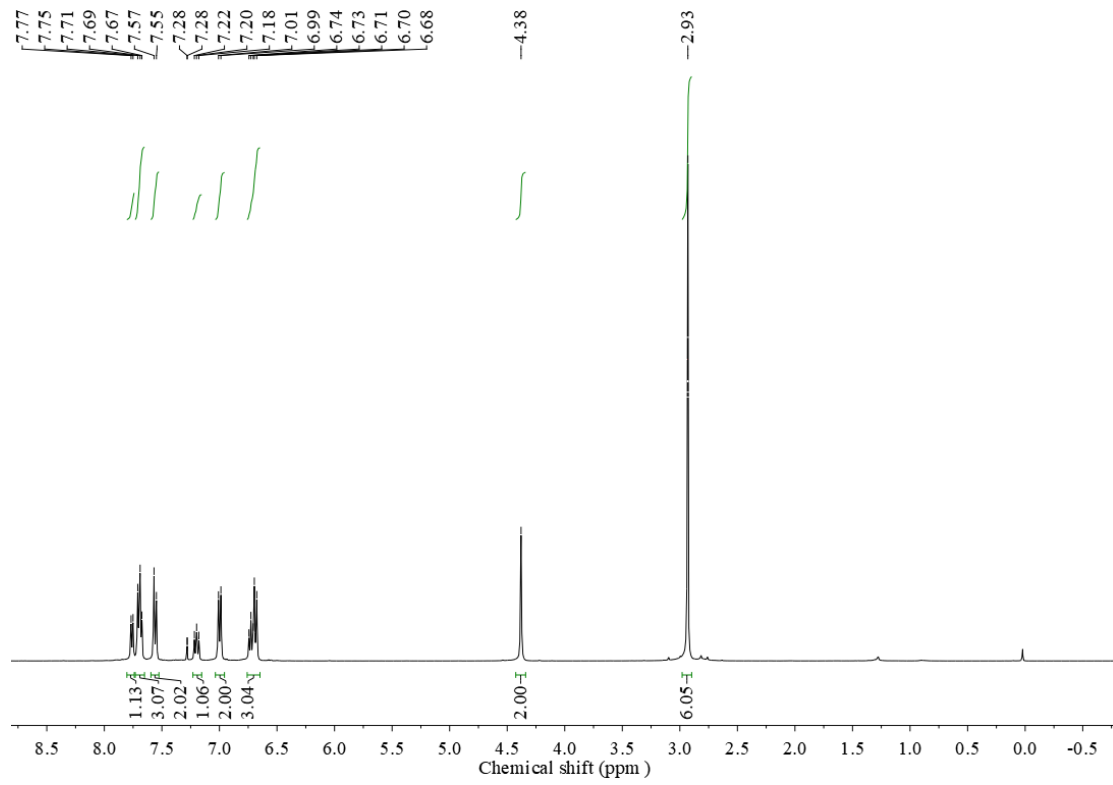

### 3d <sup>13</sup>C NMR

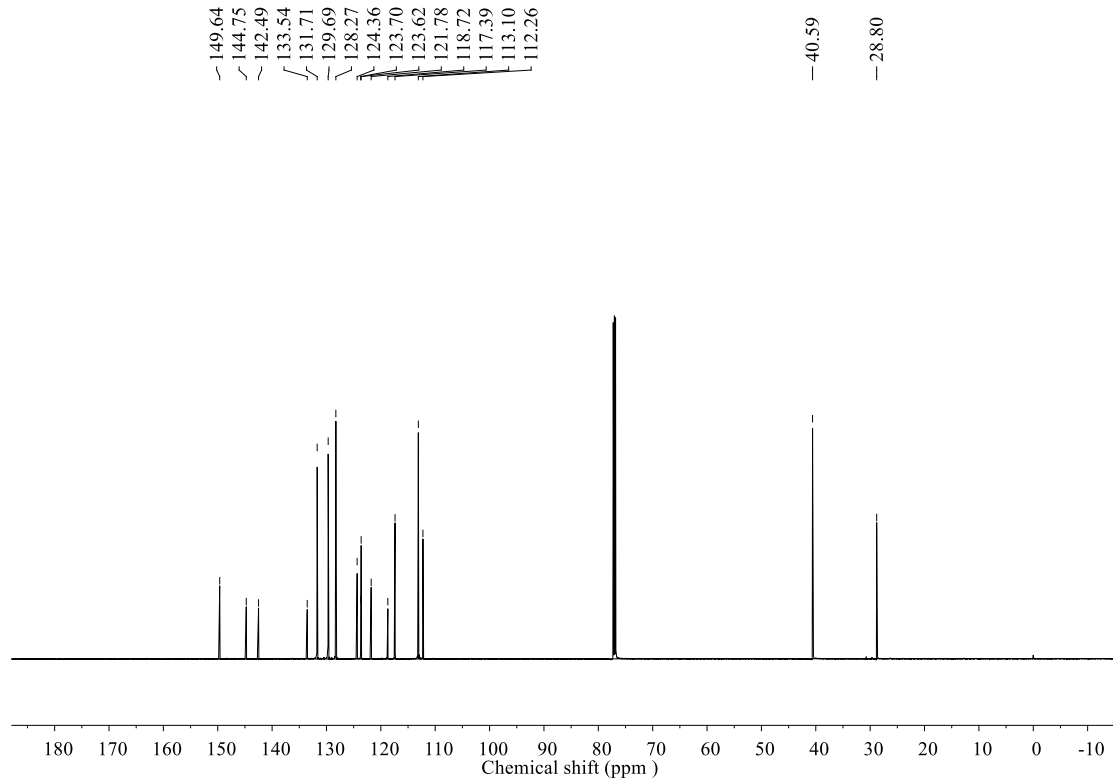

### 3e <sup>1</sup>H NMR

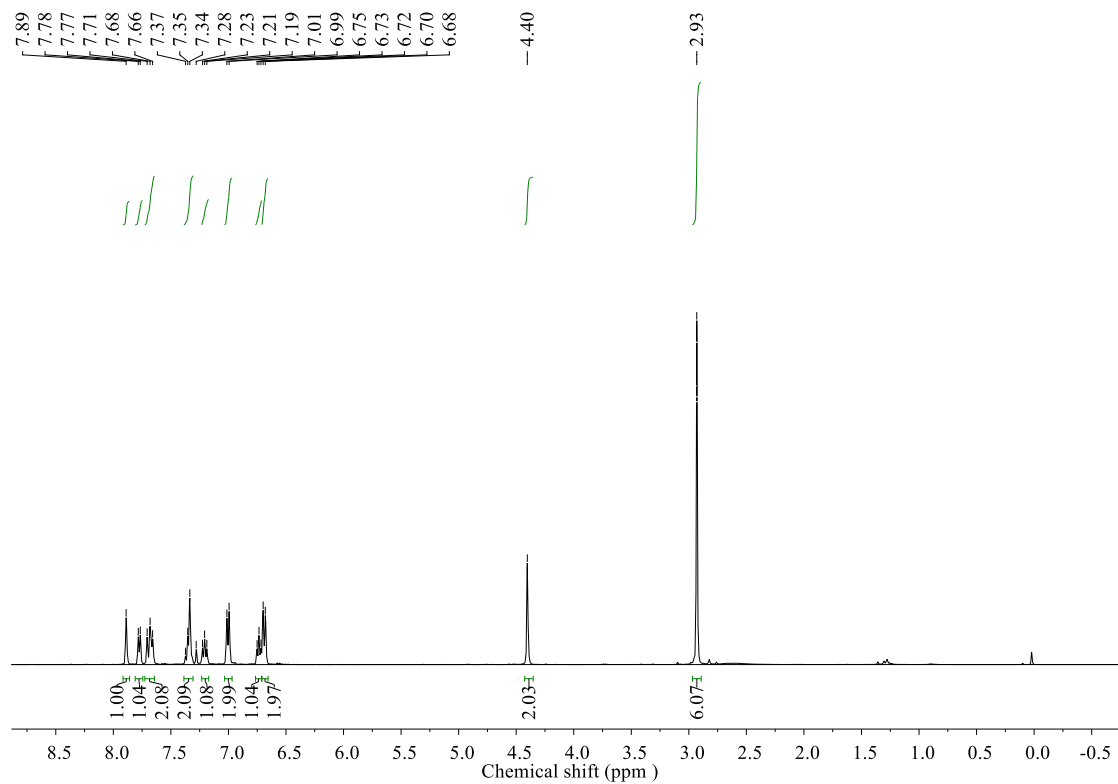

### 3e <sup>13</sup>C NMR

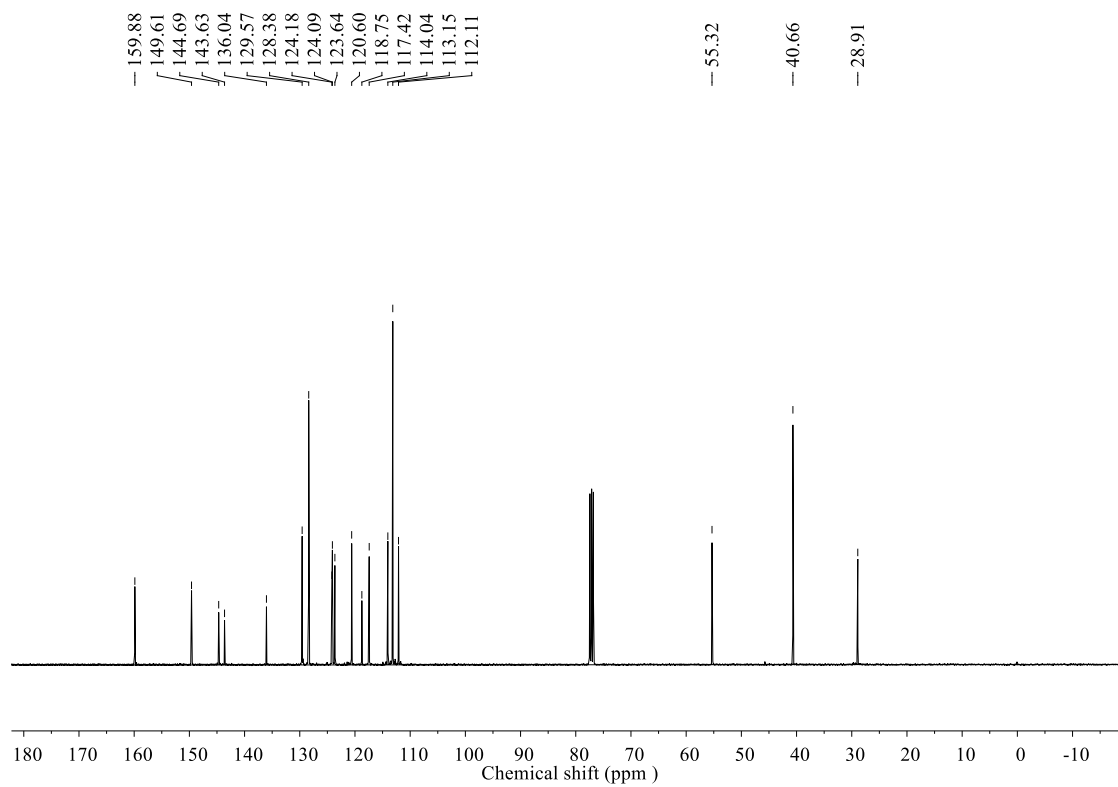

### 3f <sup>1</sup>H NMR

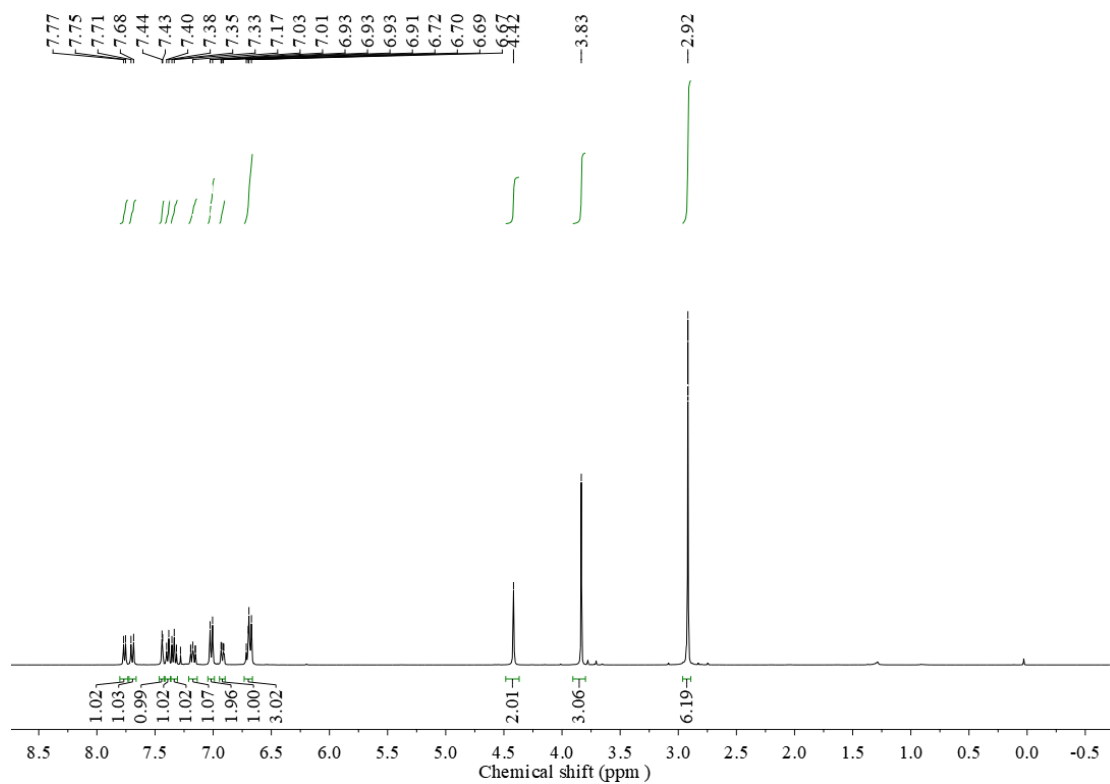

### 3f <sup>13</sup>C NMR

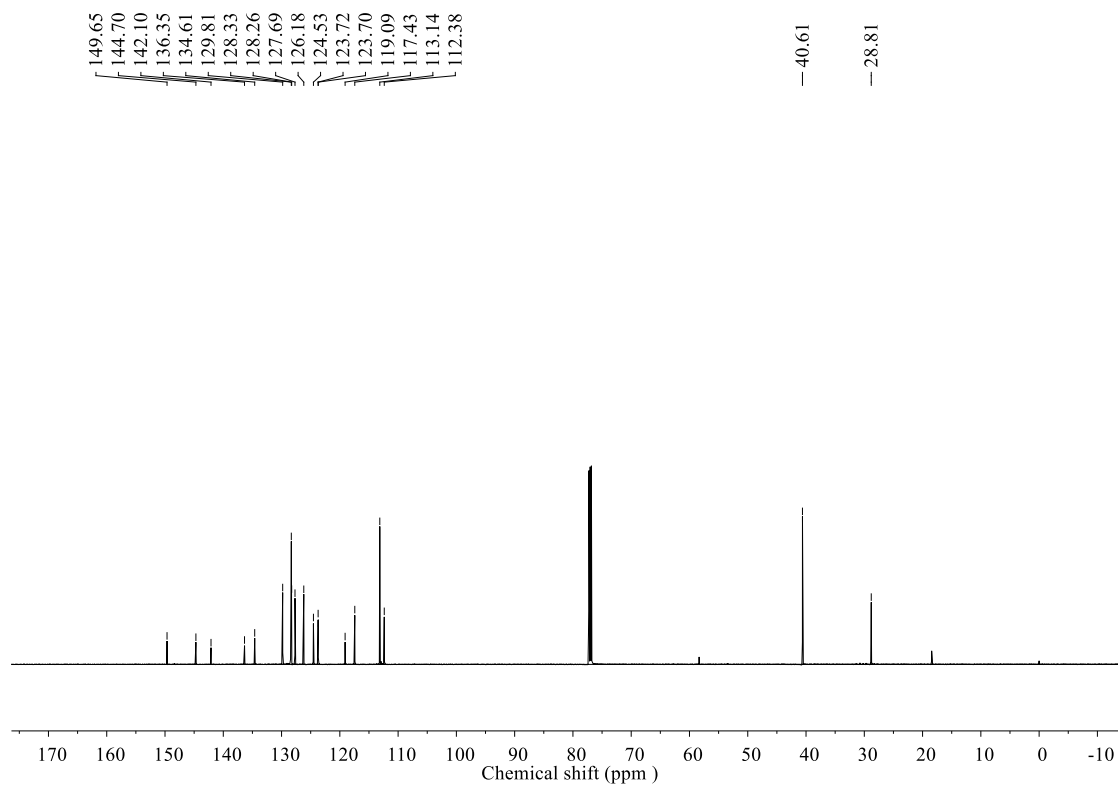

### 3g <sup>1</sup>H NMR

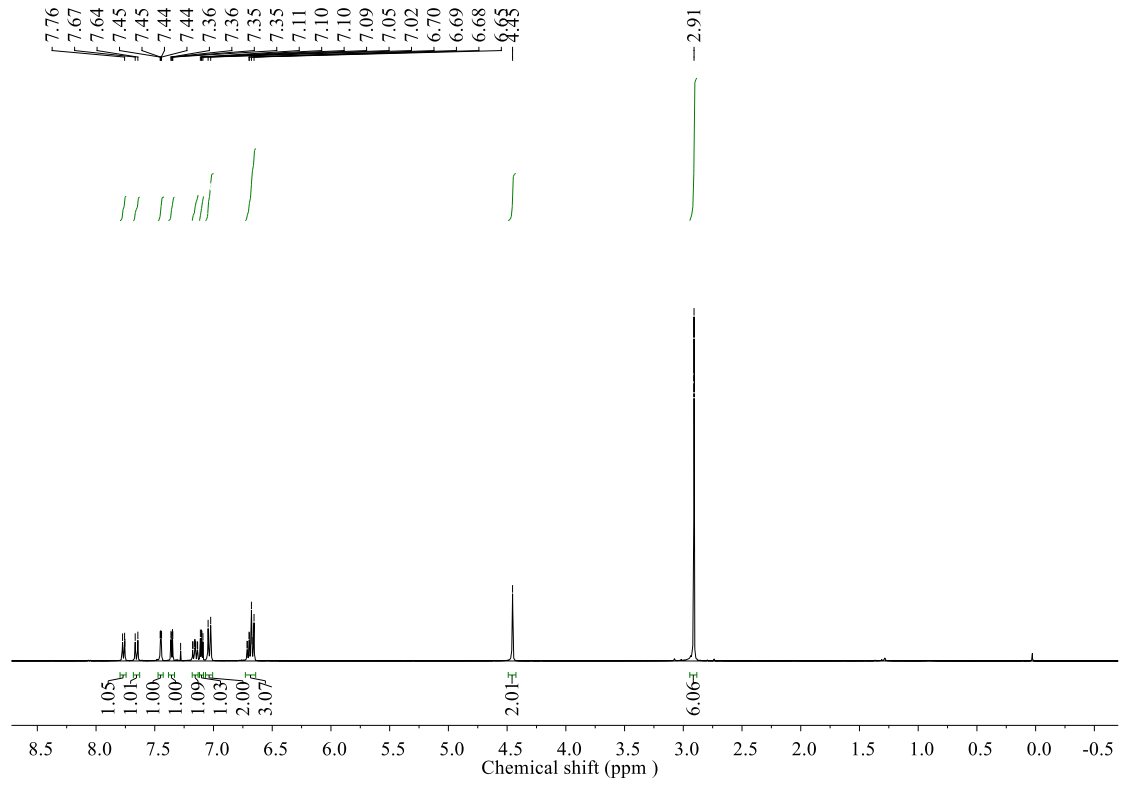

### 3g <sup>13</sup>C NMR

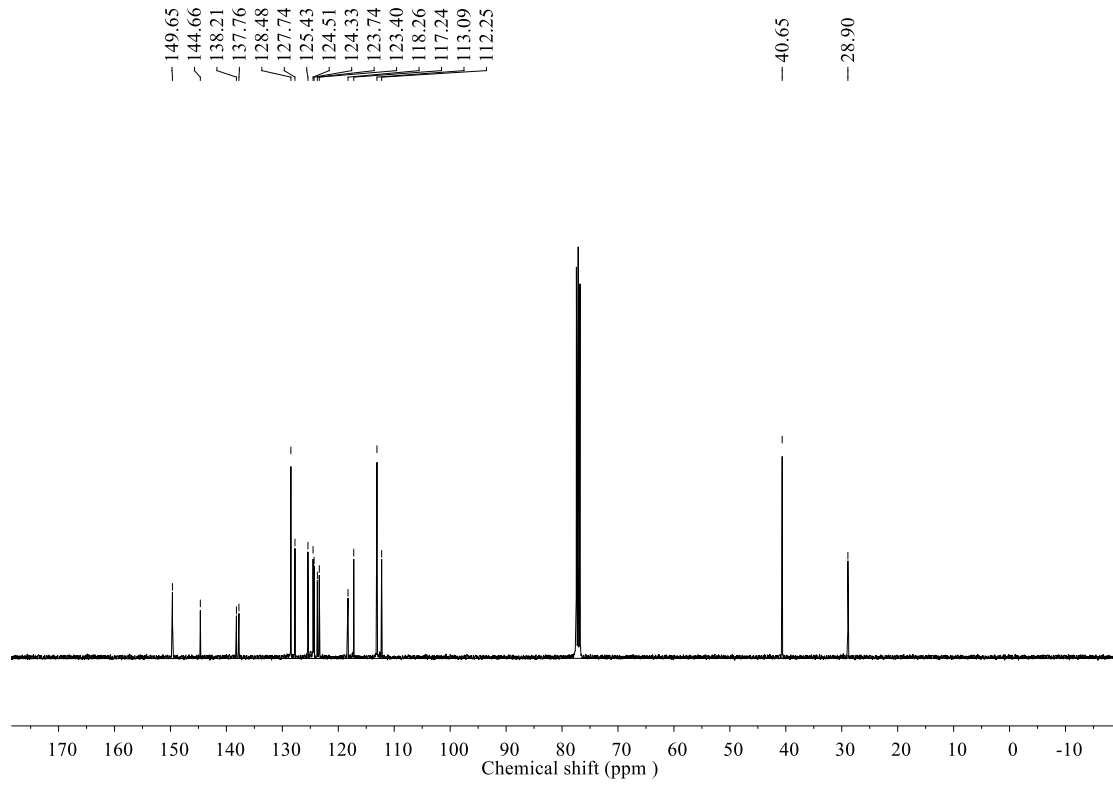



### 3h <sup>1</sup>H NMR

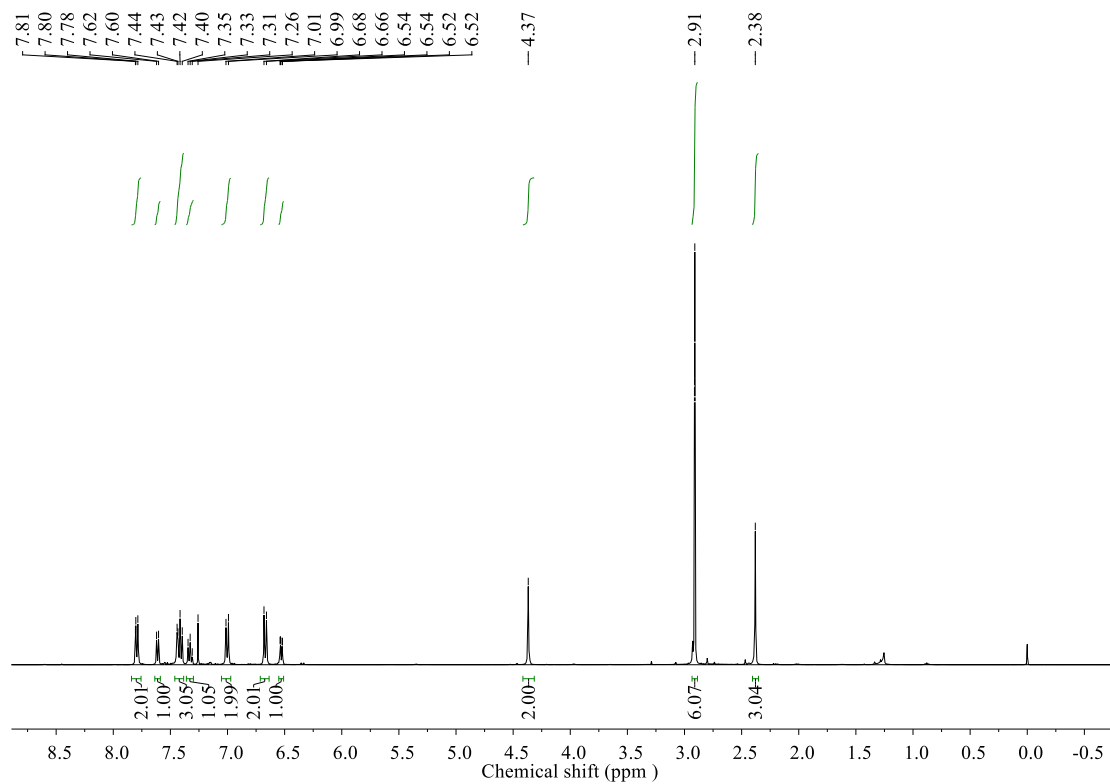

### 3h <sup>13</sup>C NMR

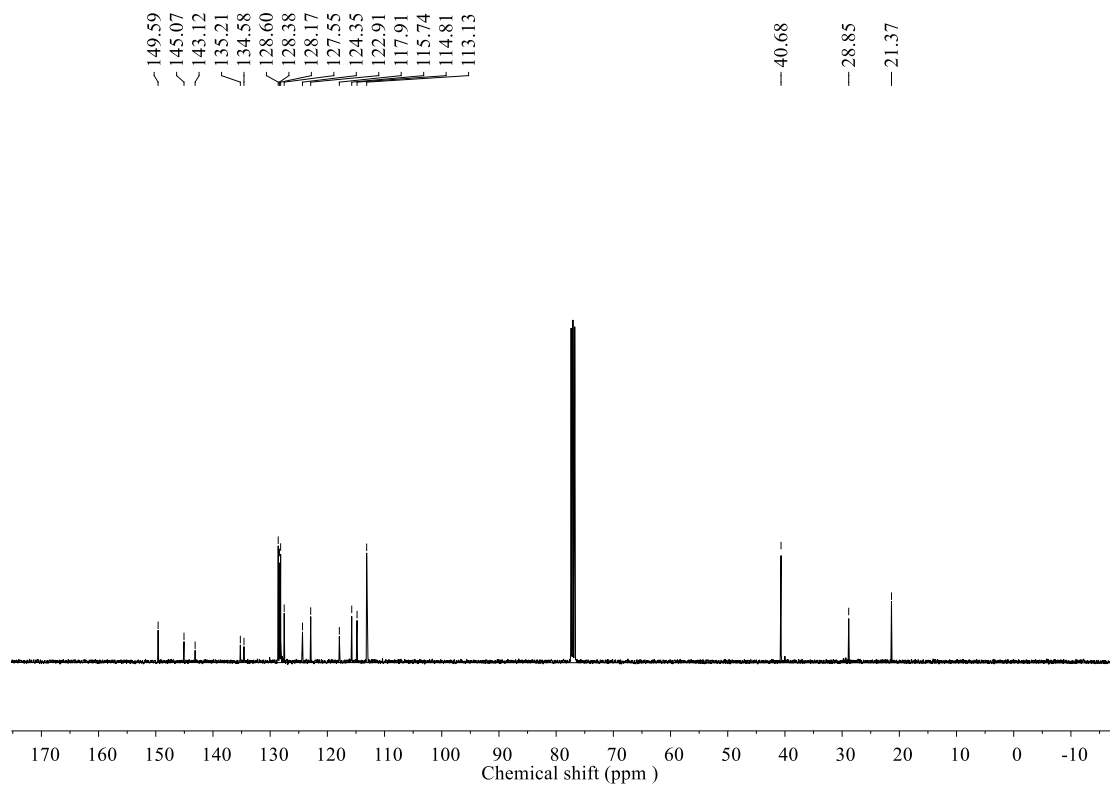

### 3i <sup>1</sup>H NMR

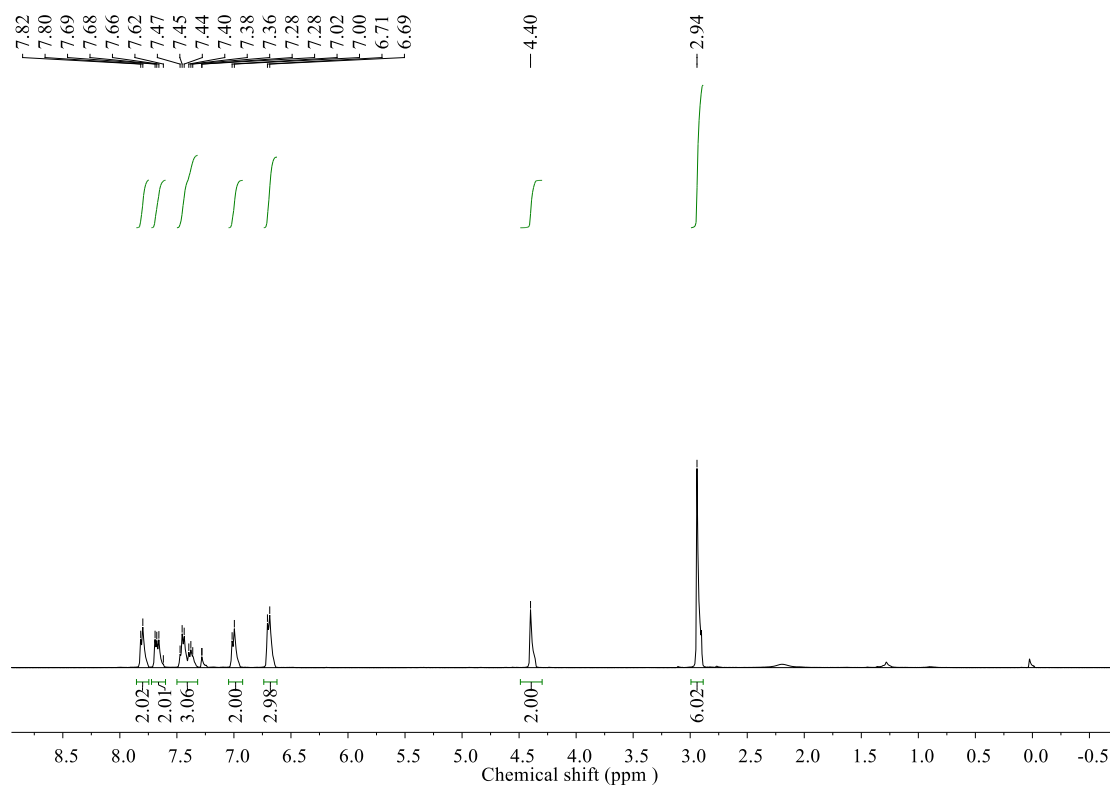

### 3i <sup>13</sup>C NMR

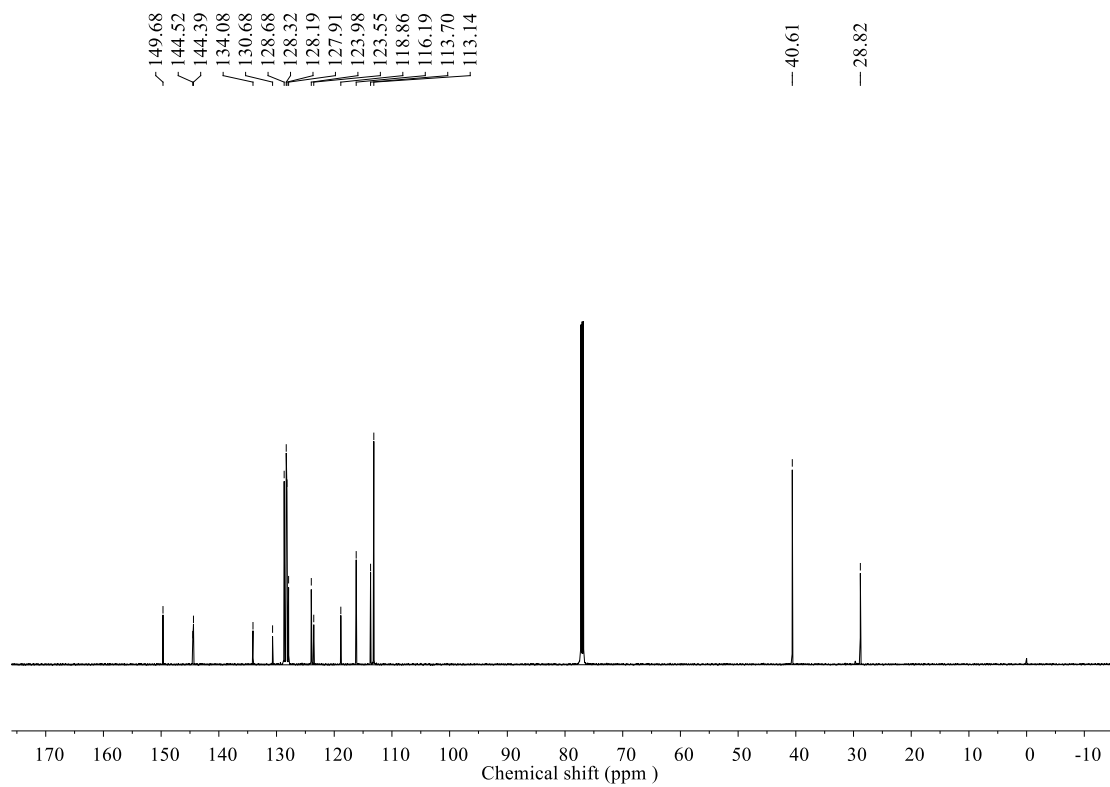

### 3j <sup>1</sup>H NMR

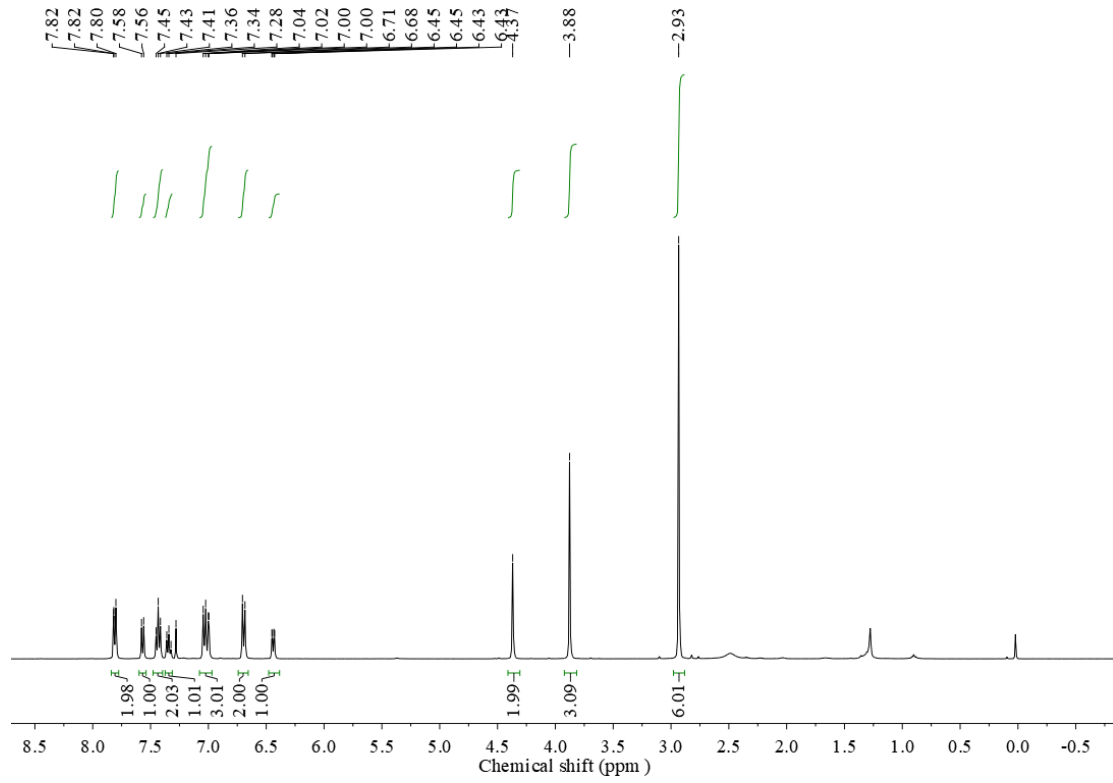

### 3j <sup>13</sup>C NMR

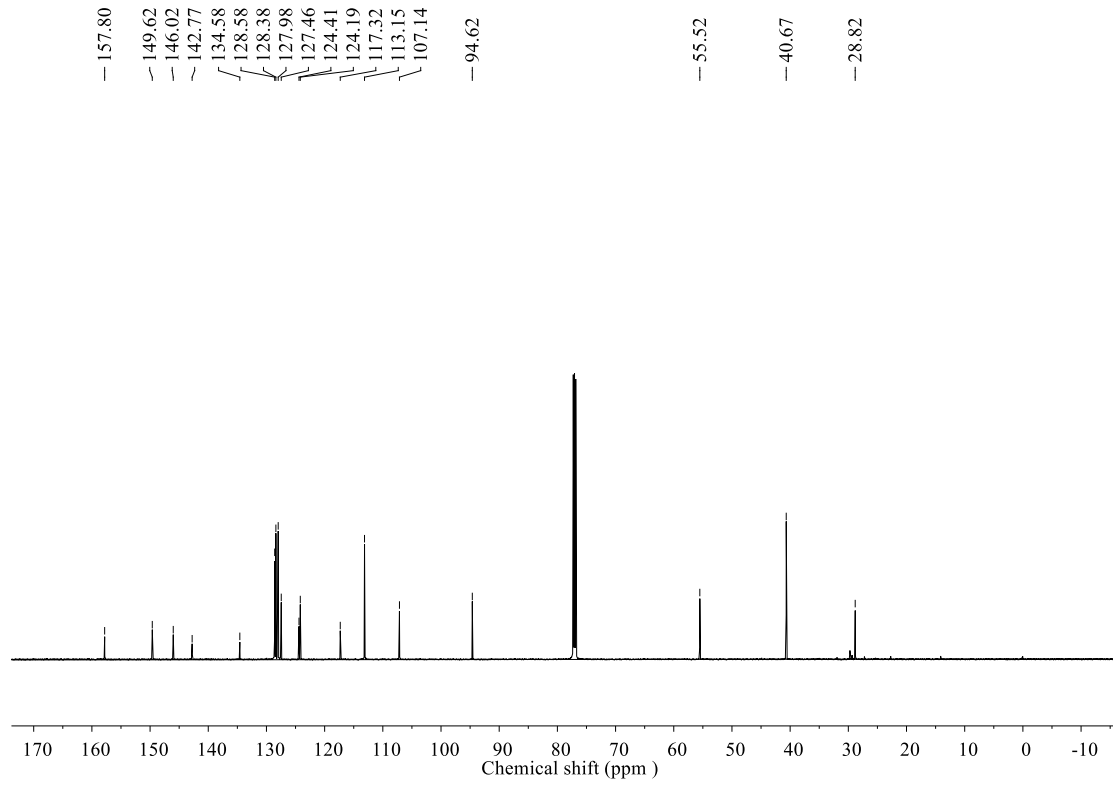

### 3k <sup>1</sup>H NMR

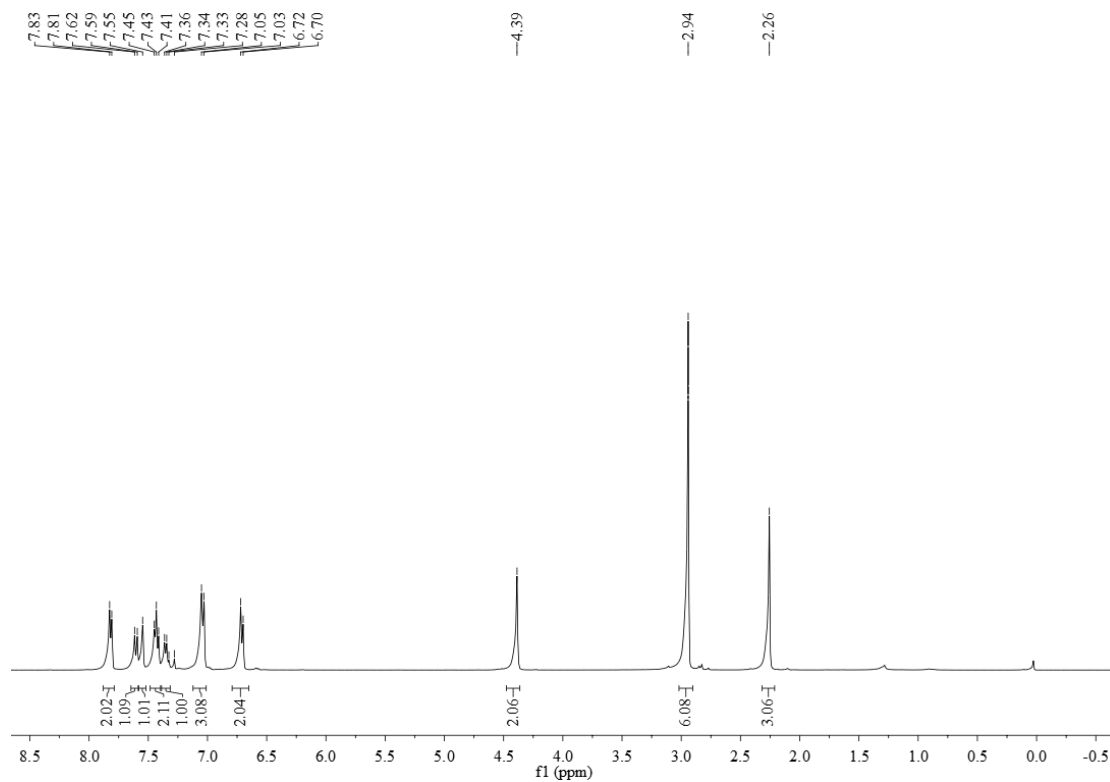

### 3k <sup>13</sup>C NMR

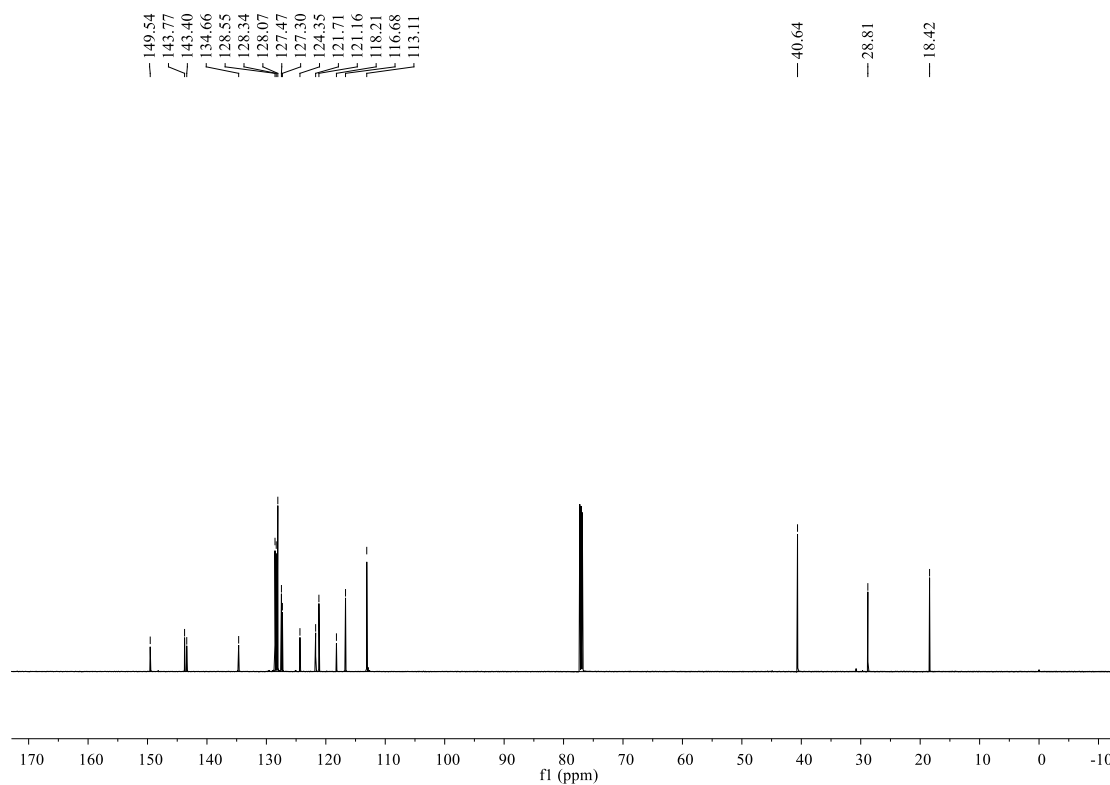

### 3m <sup>1</sup>H NMR

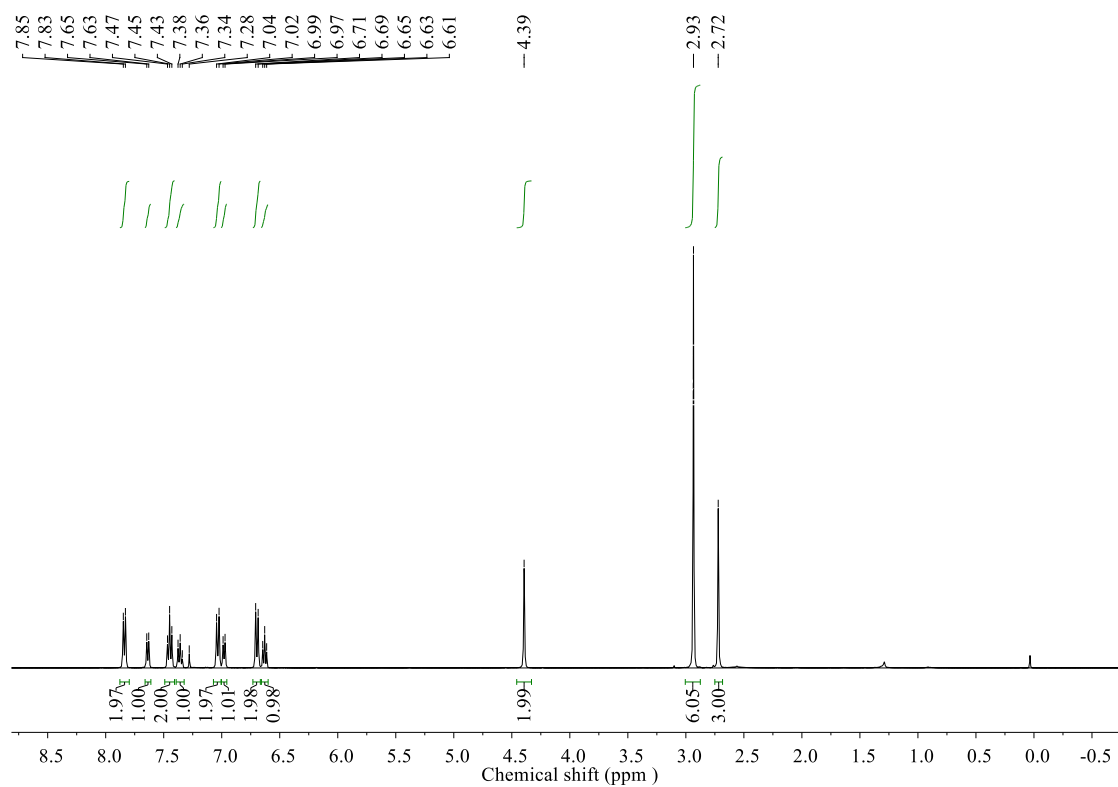

### 3m <sup>13</sup>C NMR

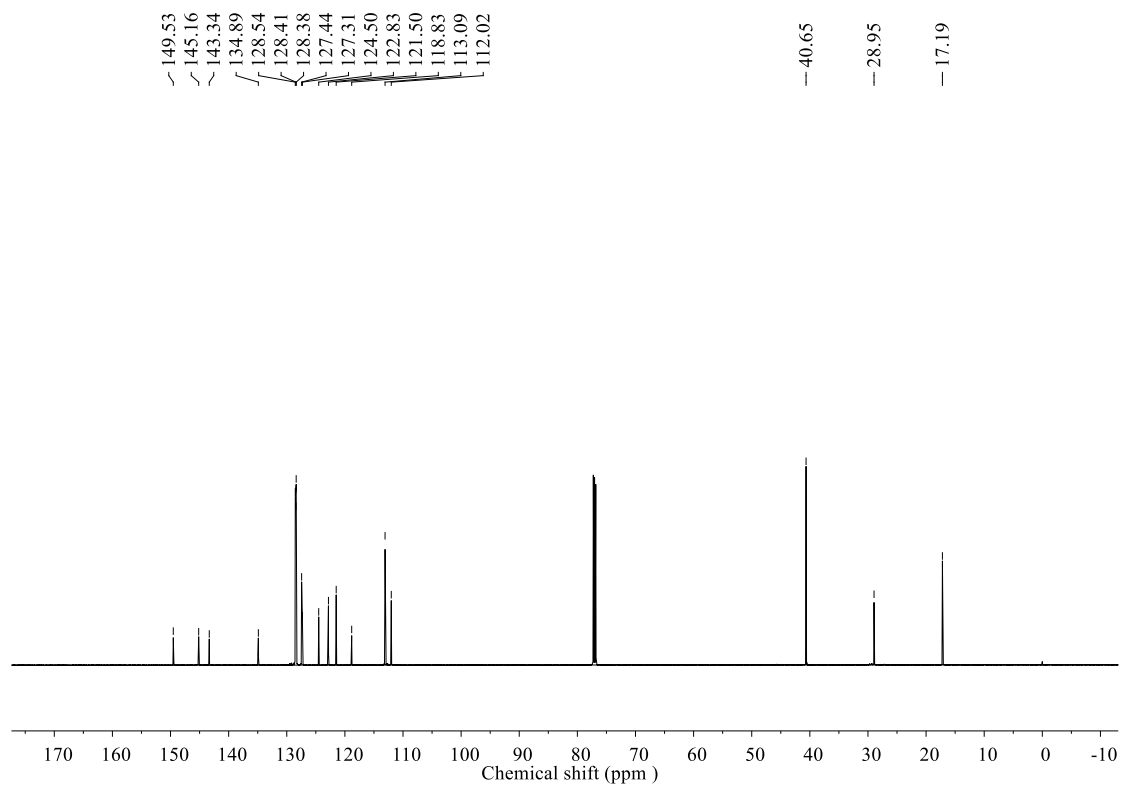

### 3n <sup>1</sup>H NMR

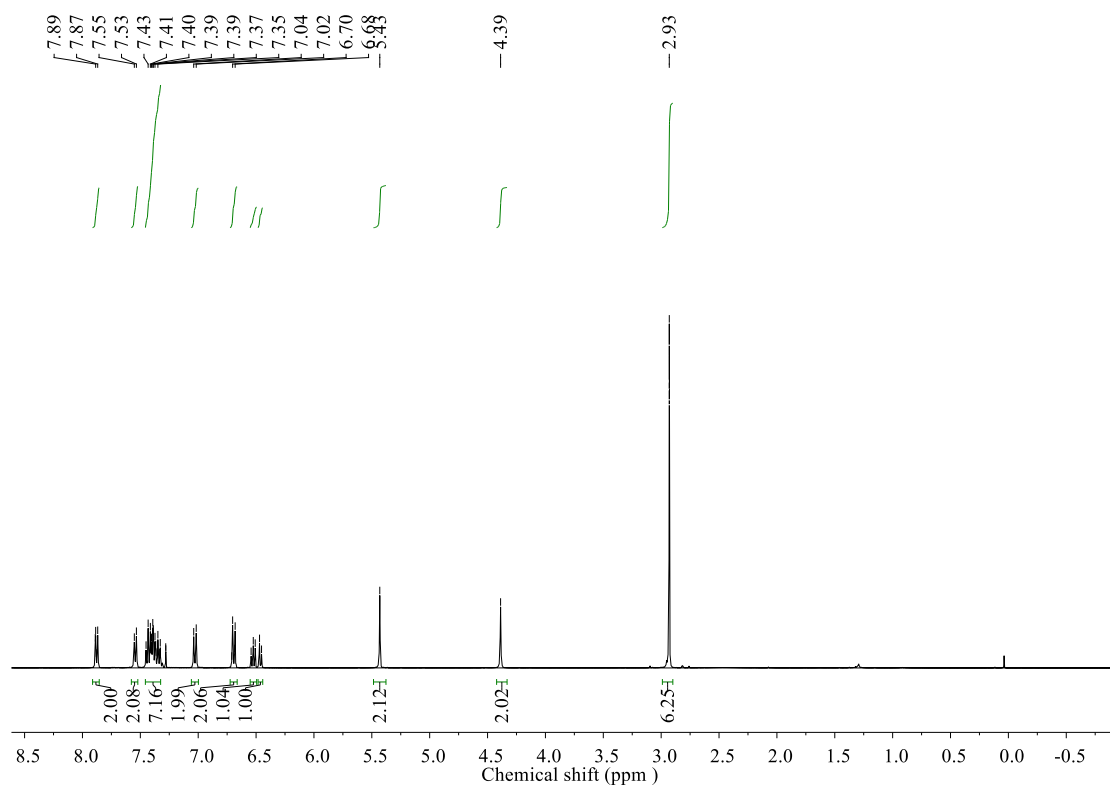

### 3n <sup>13</sup>C NMR

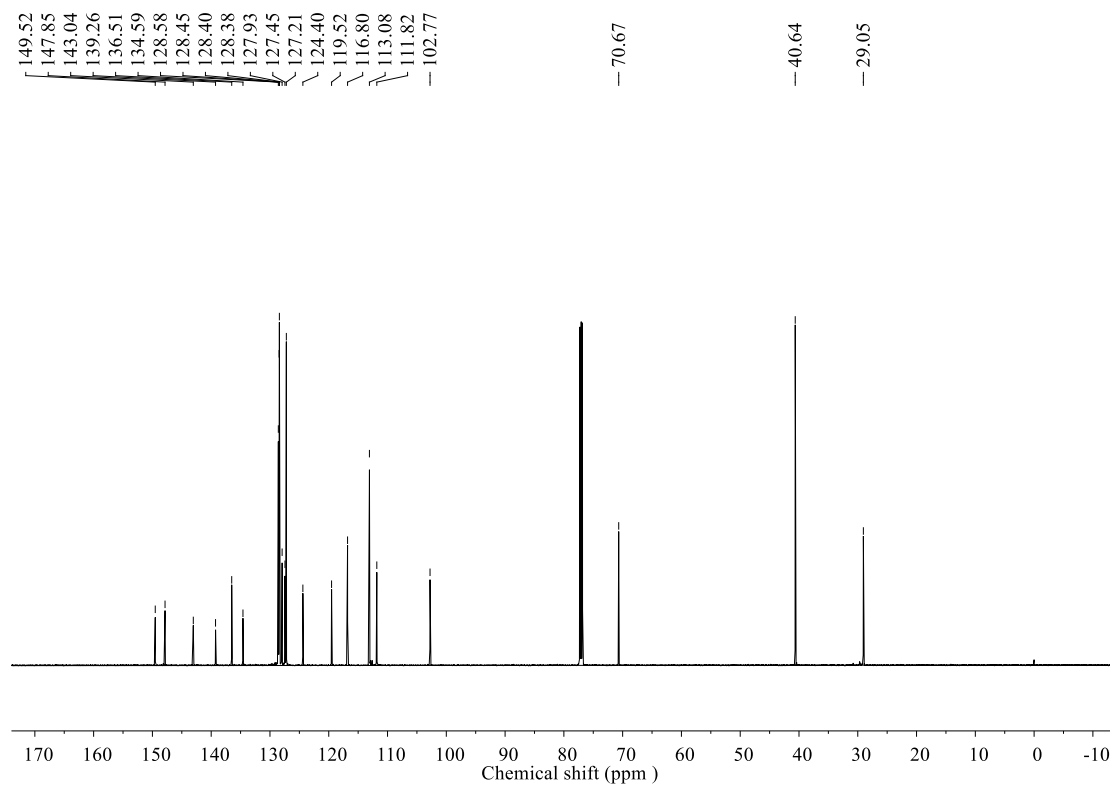

### 3o <sup>1</sup>H NMR

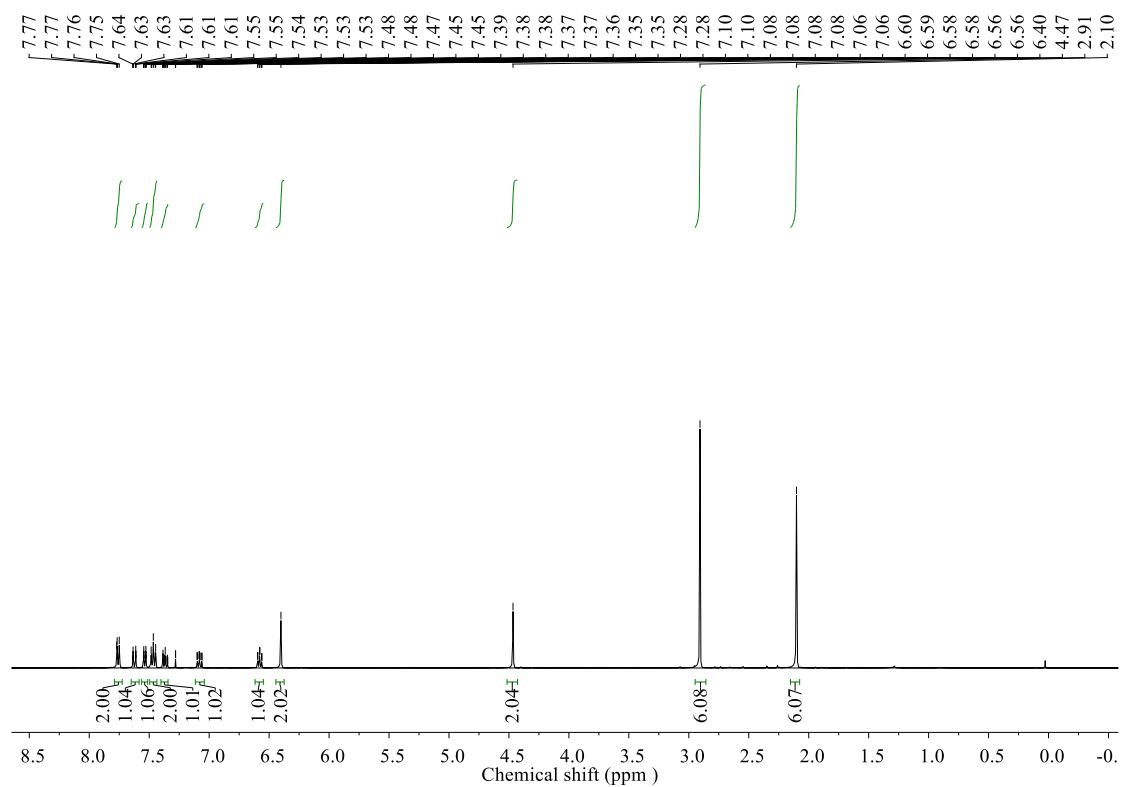

### 3o <sup>13</sup>C NMR

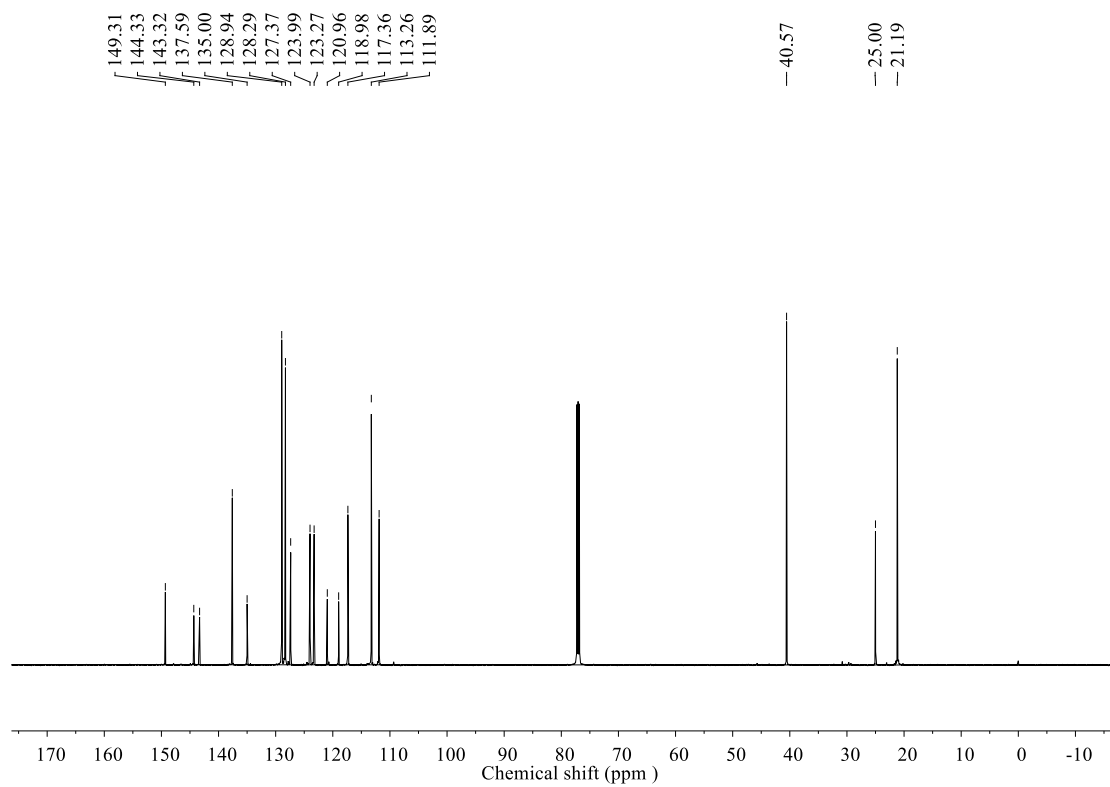

### 3p <sup>1</sup>H NMR

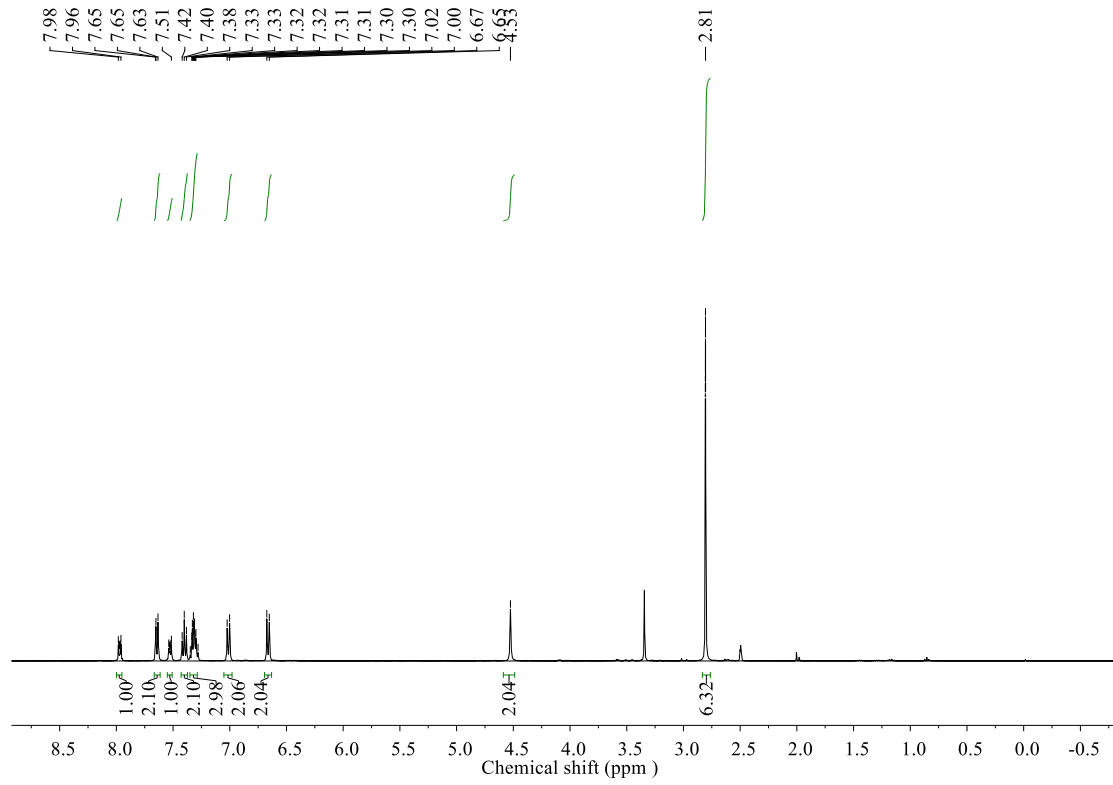

### 3p <sup>13</sup>C NMR

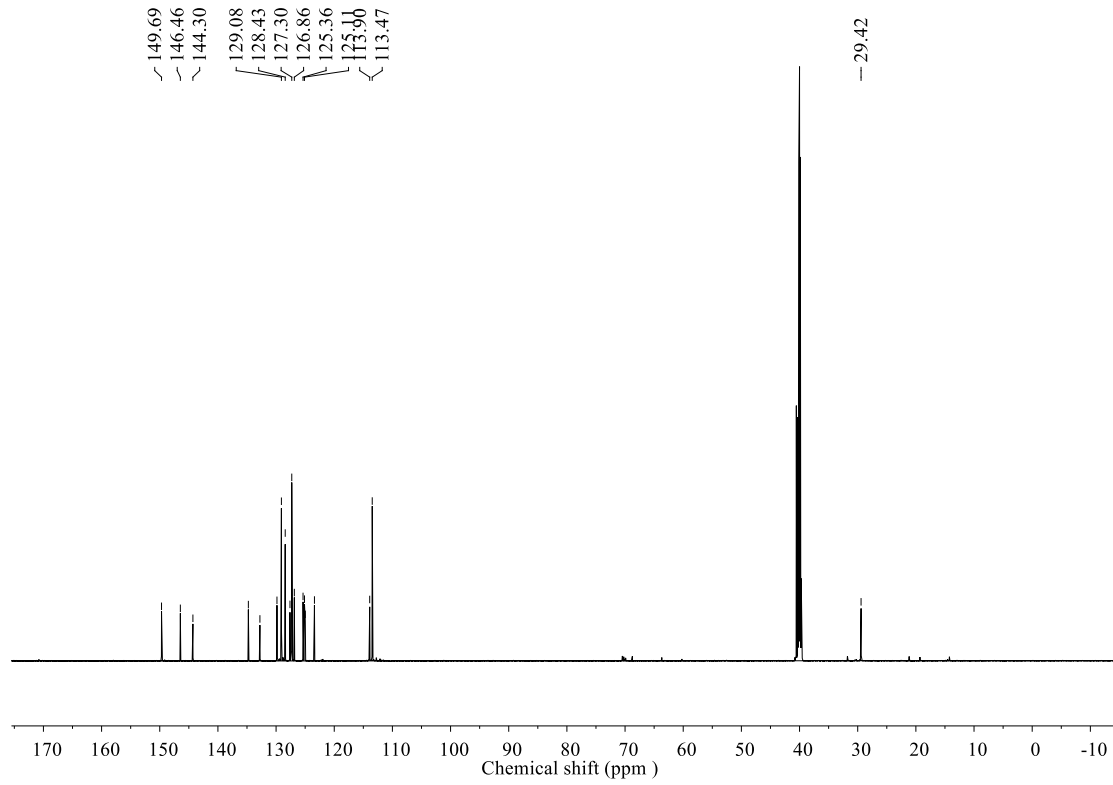



### 3q <sup>1</sup>H NMR

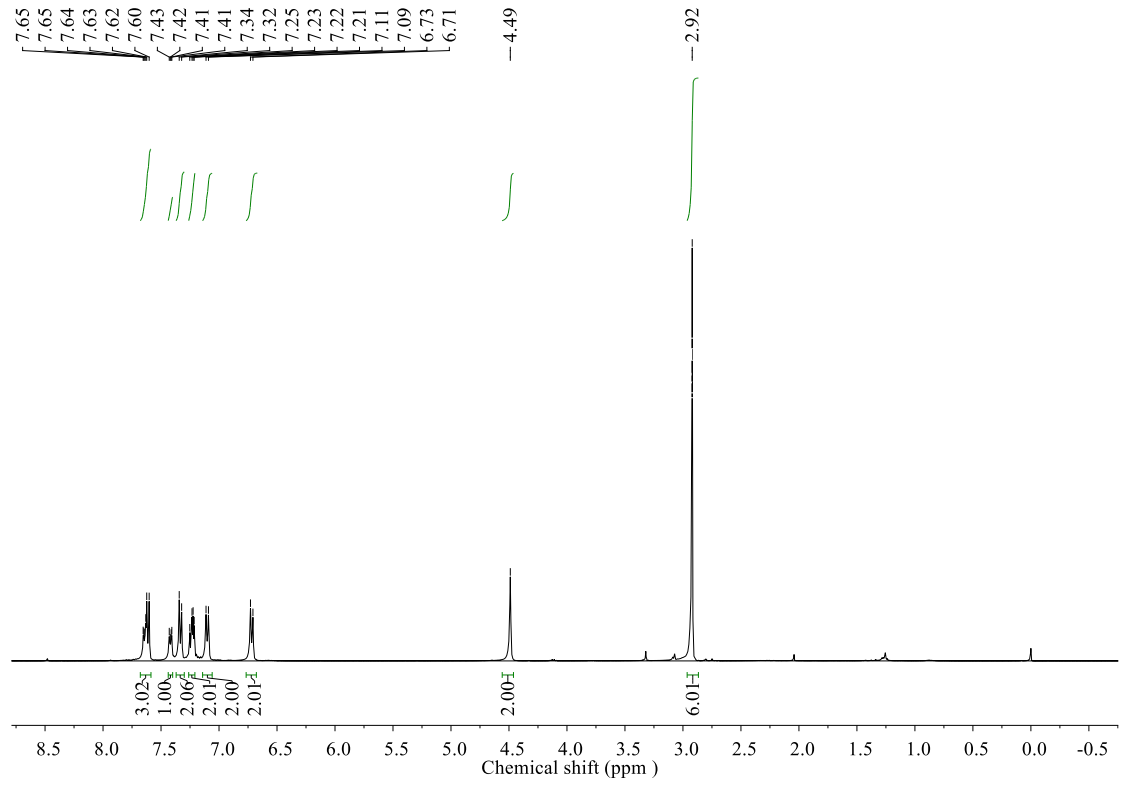

### 3q <sup>13</sup>C NMR

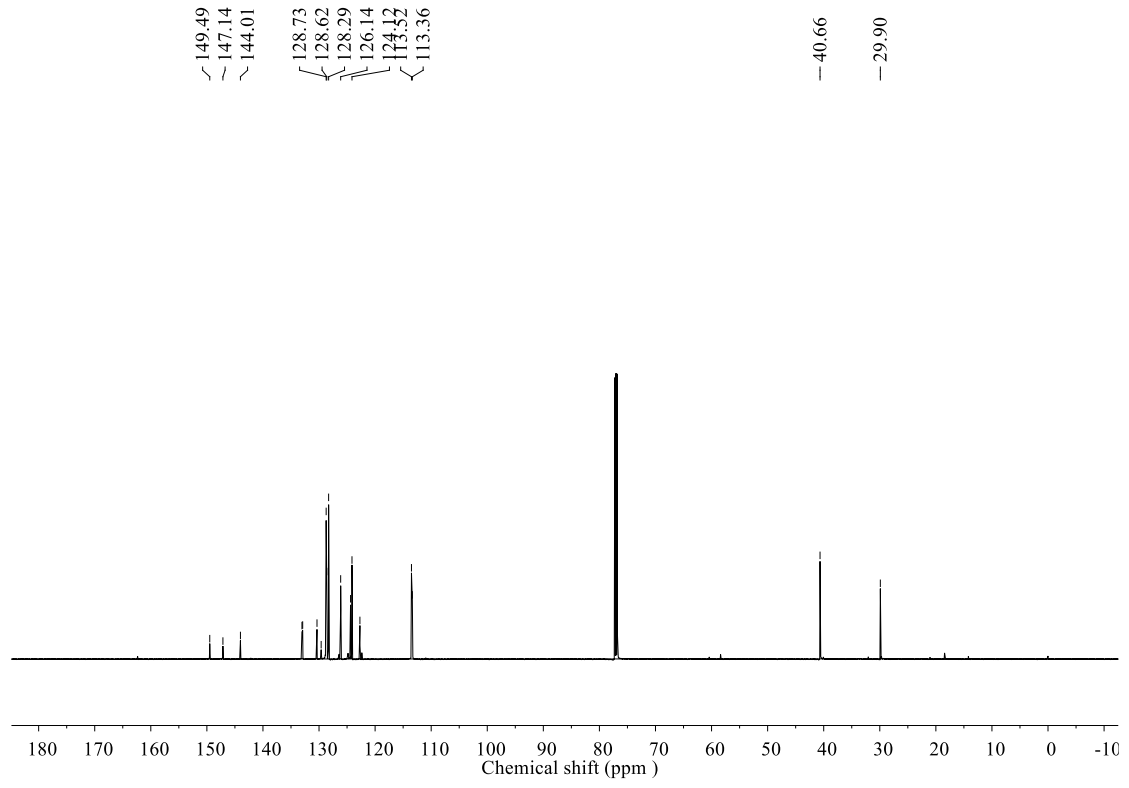

### 3r <sup>1</sup>H NMR

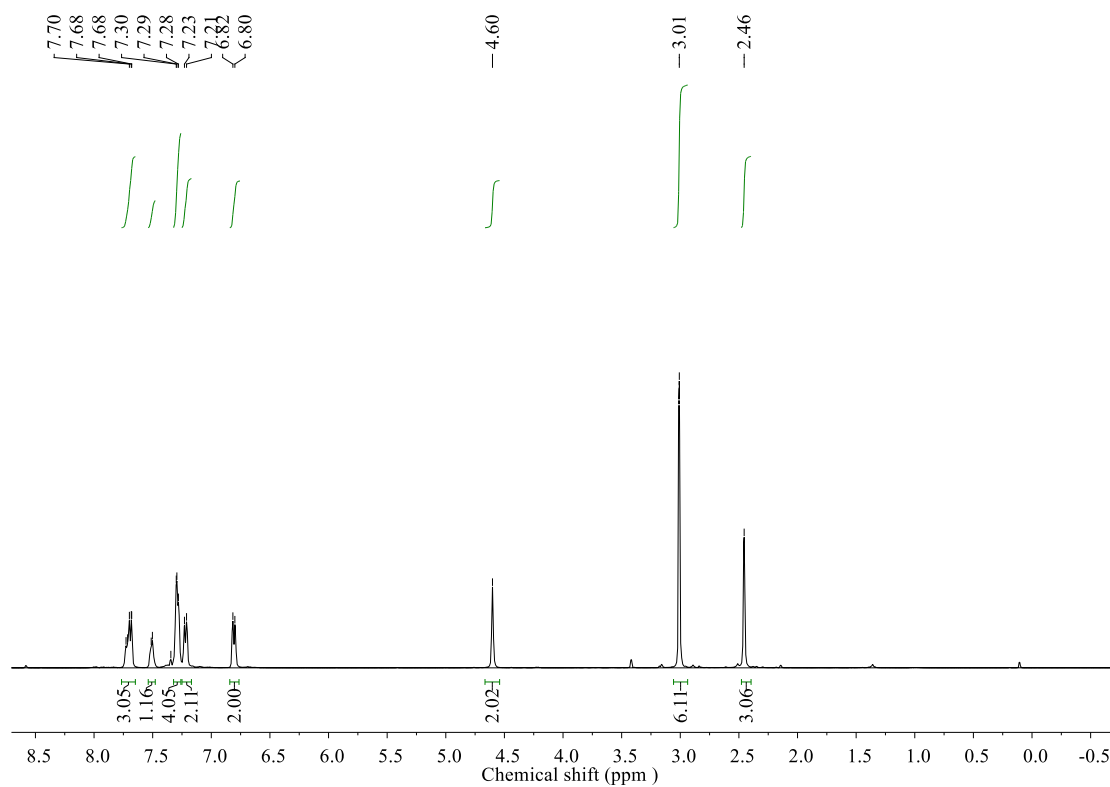

### 3r <sup>13</sup>C NMR

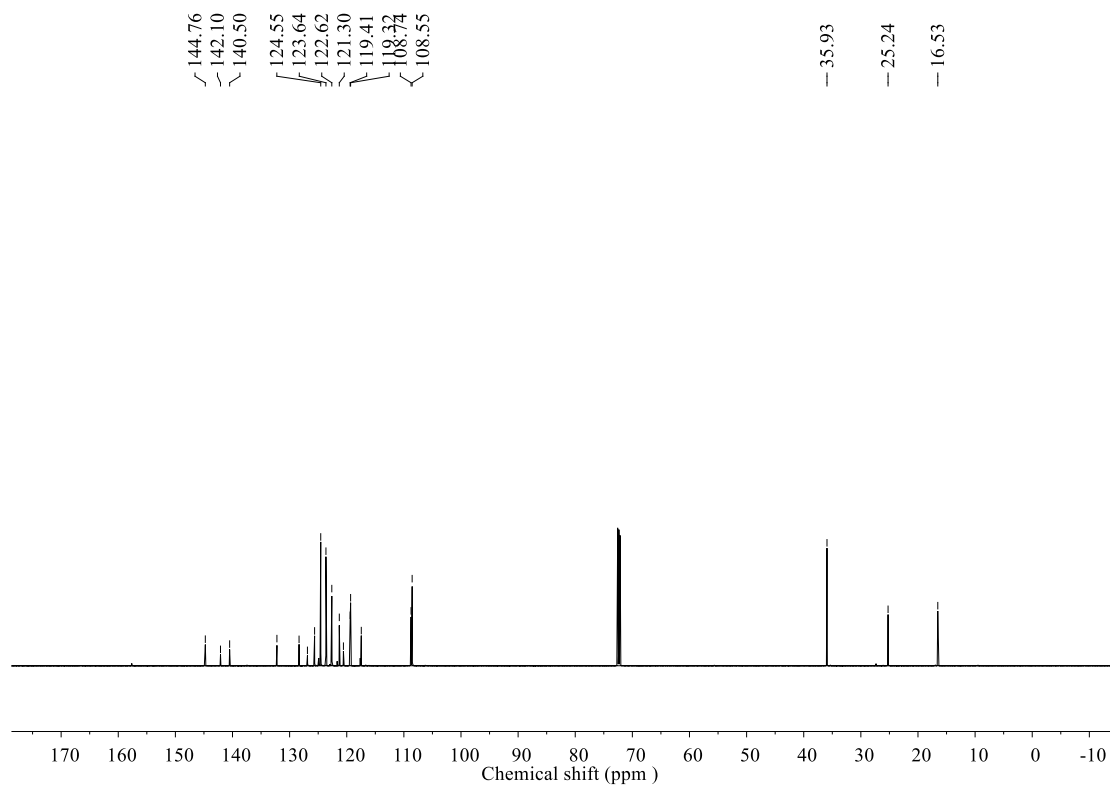

### 3s <sup>1</sup>H NMR

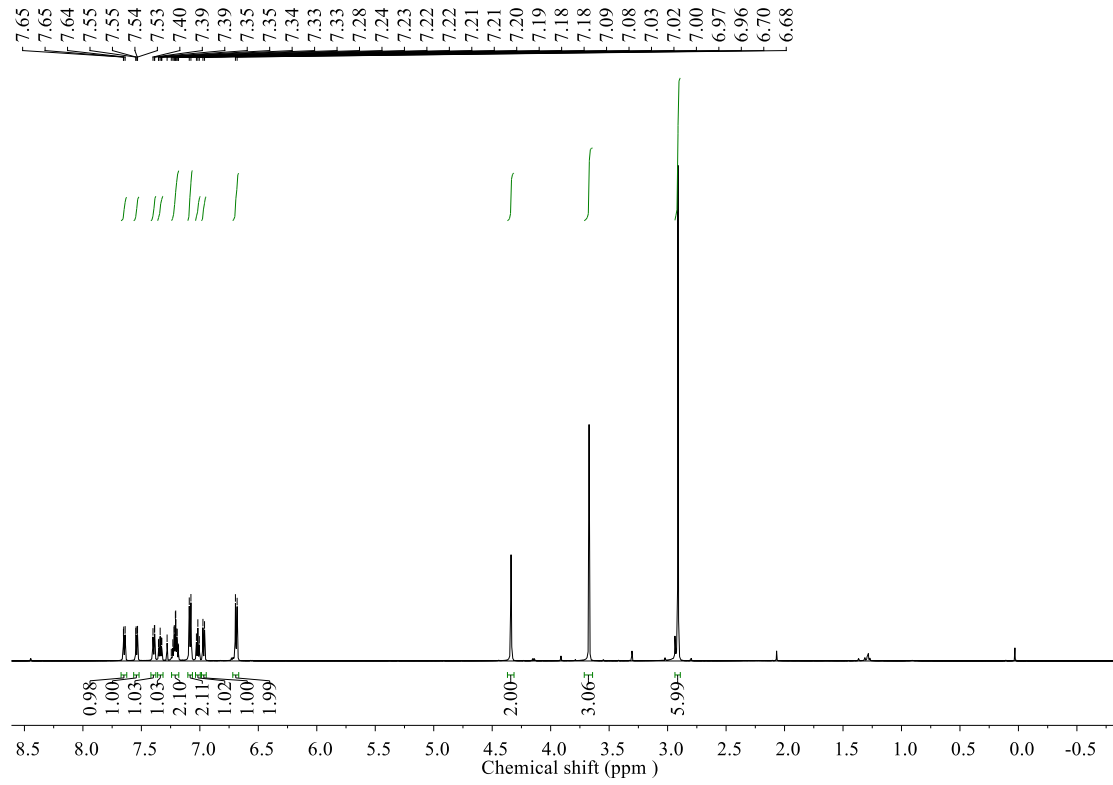

### 3s <sup>13</sup>C NMR

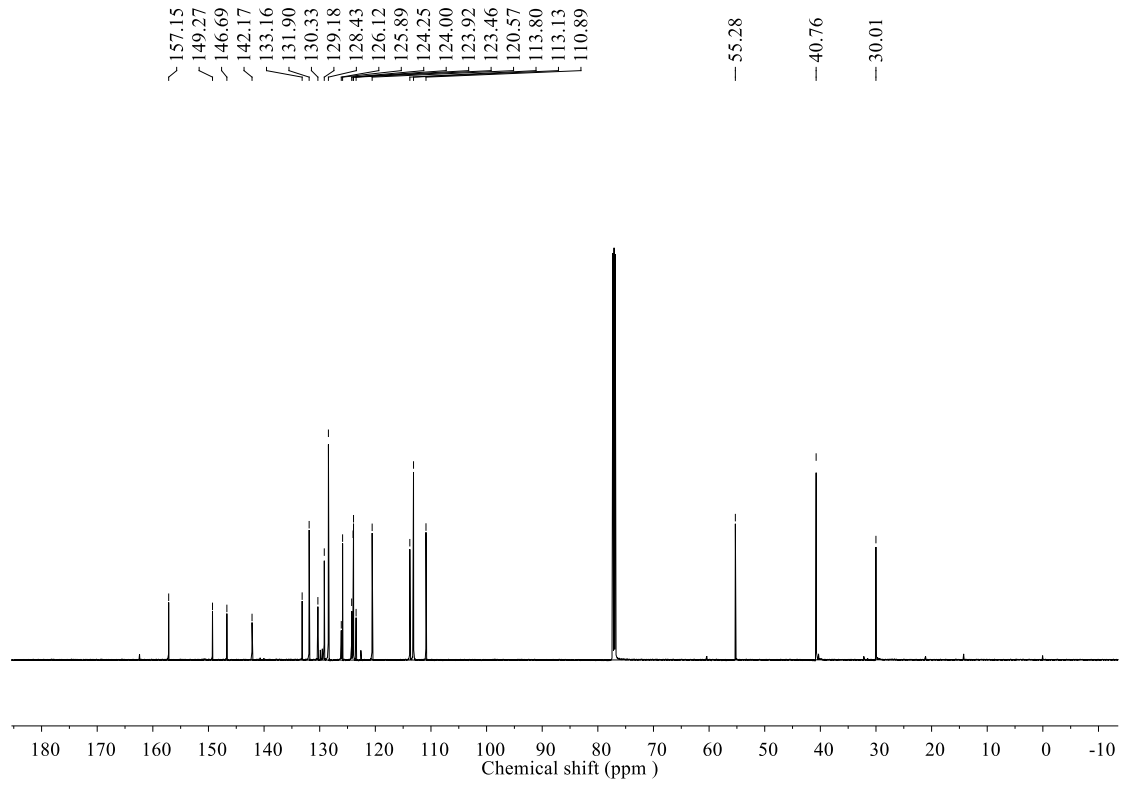

Supplement: d3ra03852a1.pdf [file d3ra03852a1.pdf]
